# Supplementary material for: Whole-Genome Immunoinformatic Analysis of F. tularensis: Predicted CTL Epitopes Clustered in Hotspots Are Prone to Elicit a T-Cell Response
Source: PubMed Central journal article supplement (PMC3098878; doi:10.1371/journal.pone.0020050), 2011-05-20
Supplement: pone.0020050.s001.pdf [file pone.0020050.s001.pdf]

Supplement Table 1: Compilation of data for 1240 cluster-based selected putative MHC binders (Subset I)

| Sequence     | Length | Predicted allele | Affinity (IC <sub>50</sub> , nM) | Cluster density | Protein gi# | Protein annotation             | Responder <sup>(a)</sup> |                               |  |
|--------------|--------|------------------|----------------------------------|-----------------|-------------|--------------------------------|--------------------------|-------------------------------|--|
| LGGIIFNIL    | 9      | Kb               | 476                              | 1.1             | 89255471    | serine transporter             |                          |                               |  |
| LGGIIFNILYL  | 11     | Kb               | 594                              | 1.1             |             |                                |                          |                               |  |
| GGIIFNILYL   | 10     | Kb               | 648                              | 1.1             |             |                                |                          |                               |  |
| GIIFNILYL    | 9      | Db               | 562                              | 1.1             |             |                                |                          |                               |  |
| IIFNILYL     | 8      | Kb               | 309                              | 1.1             |             |                                |                          |                               |  |
| IIFNILYLFAI  | 11     | Kb               | 388                              | 1.1             |             |                                |                          |                               |  |
| FNILYLFAI    | 9      | Db               | 590                              | 1.1             |             |                                |                          |                               |  |
| FNILYLFAIL   | 10     | Kb               | 391                              | 1.1             |             |                                |                          |                               |  |
| NILYLFAIL    | 9      | Kb               | 292                              | 1.1             |             |                                |                          |                               |  |
| ILYLFAIL     | 8      | Kb               | 11                               | 1.1             |             |                                |                          |                               |  |
| ILYLFAILP    | 9      | Kb               | 326                              | 1.1             |             |                                |                          |                               |  |
| ILYLFAILPI   | 10     | Kb               | 145                              | 1.1             |             |                                |                          |                               |  |
| ILYLFAILPIL  | 11     | Kb               | 38                               | 1.1             |             |                                |                          |                               |  |
| LYLFAILPI    | 9      | Kd               | 299                              | 1.1             |             |                                |                          |                               |  |
| LYLFAILPIL   | 10     | Kb               | 449                              | 1.1             |             |                                |                          |                               |  |
| LYLFAILPILL  | 11     | Kb               | 442                              | 1.1             |             |                                |                          |                               |  |
| YLFAILPIL    | 9      | Kb               | 909                              | 1.1             |             |                                |                          |                               |  |
| YLFAILPILL   | 10     | Kb               | 911                              | 1.1             |             |                                |                          |                               |  |
| FAILPILL     | 8      | Db               | 135                              | 1.1             |             |                                |                          |                               |  |
| ITILIFYAL    | 11     | Kb               | 38                               | 1.4             |             |                                | 89255508                 | hypothetical membrane protein |  |
| TILIFYAL     | 10     | Kb               | 63                               | 1.4             |             |                                |                          |                               |  |
| TILIFYALI    | 11     | Kb               | 725                              | 1.4             |             |                                |                          |                               |  |
| IILIFYA      | 8      | Kb               | 641                              | 1.4             |             |                                |                          |                               |  |
| IILIFYAL     | 9      | Kb               | 13                               | 1.4             |             |                                |                          |                               |  |
| IILIFYALI    | 10     | Kb               | 129                              | 1.4             |             |                                |                          |                               |  |
| ILIFYAL      | 8      | Kb               | 45                               | 1.4             |             |                                |                          |                               |  |
| ILIFYALI     | 9      | Kb               | 296                              | 1.4             |             |                                |                          |                               |  |
| ILIFYALINI   | 11     | Kb               | 686                              | 1.4             |             |                                |                          |                               |  |
| LIFYALI      | 8      | Kb               | 80                               | 1.4             |             |                                |                          |                               |  |
| LIFYALINI    | 10     | Kb               | 422                              | 1.4             |             |                                |                          |                               |  |
| LIFYALINIL   | 11     | Kb               | 67                               | 1.4             |             |                                |                          |                               |  |
| IFYALINI     | 9      | Kb               | 445                              | 1.4             |             |                                |                          |                               |  |
| IFYALINIL    | 10     | Kb               | 46                               | 1.4             |             |                                |                          |                               |  |
| IFYALINILL   | 11     | Kb               | 107                              | 1.4             |             |                                |                          |                               |  |
| FYALINI      | 8      | Kd               | 110                              | 1.4             |             |                                |                          |                               |  |
| FYALINIL     | 9      | Kd               | 72                               | 1.4             |             |                                |                          |                               |  |
| FYALINILL    | 10     | Kd               | 253                              | 1.4             |             |                                |                          |                               |  |
| YALINIL      | 8      | Kd               | 266                              | 1.4             |             |                                |                          |                               |  |
| YALINILL     | 8      | Db               | 41                               | 1.4             | 89255524    | B-type cytochrome              |                          |                               |  |
| SKIFSYHYI    | 9      | Db               | 391                              | 1.0             |             |                                |                          |                               |  |
| KIFSYHYI     | 8      | Kb               | 144                              | 1.0             |             |                                |                          |                               |  |
| FSHYIFA      | 8      | Kb               | 239                              | 1.0             |             |                                |                          |                               |  |
| FSHYIFASV    | 10     | Kb               | 125                              | 1.0             |             |                                |                          |                               |  |
| FSHYIFASVL   | 11     | Kb               | 45                               | 1.0             |             |                                |                          |                               |  |
| SYHYIFASV    | 9      | Kd               | 90                               | 1.0             |             |                                |                          |                               |  |
| SYHYIFASVL   | 10     | Kd               | 42                               | 1.0             |             |                                |                          |                               |  |
| SYHYIFASVLL  | 11     | Kd               | 370                              | 1.0             |             |                                |                          |                               |  |
| YHYIFASV     | 8      | Kb               | 11                               | 1.0             |             |                                |                          |                               |  |
| YHYIFASVL    | 9      | Kb               | 244                              | 1.0             |             |                                |                          |                               |  |
| YHYIFASVLL   | 10     | Kb               | 319                              | 1.0             |             |                                |                          |                               |  |
| HYIFASVL     | 8      | Kd               | 36                               | 1.0             |             |                                |                          |                               |  |
| HYIFASVLL    | 9      | Kd               | 347                              | 1.0             |             |                                |                          |                               |  |
| HYIFASVLLVL  | 11     | Kd               | 208                              | 1.0             |             |                                |                          |                               |  |
| ASVLLVLVVL   | 10     | Kb               | 383                              | 1.0             |             |                                |                          |                               |  |
| SVLLVLVVL    | 9      | Kb               | 269                              | 1.0             |             |                                | 89255563                 | hypothetical protein          |  |
| INSYINYKLL   | 11     | Kb               | 328                              | 1.0             |             |                                |                          |                               |  |
| NSYIINYKLL   | 9      | Kb               | 667                              | 1.0             |             |                                |                          |                               |  |
| NSYIINYKLL   | 10     | Kb               | 162                              | 1.0             |             |                                |                          |                               |  |
| SYIINYKLL    | 8      | Kd               | 297                              | 1.0             |             |                                |                          |                               |  |
| SYIINYKLL    | 9      | Kb               | 258                              | 1.0             |             |                                |                          |                               |  |
| SYIINYKLLNI  | 11     | Kd               | 421                              | 1.0             |             |                                |                          |                               |  |
| YIINYKLL     | 8      | Kb               | 41                               | 1.0             |             |                                |                          |                               |  |
| INYKLLNI     | 8      | Kb               | 70                               | 1.0             |             |                                |                          |                               |  |
| INYKLLNINL   | 10     | Kb               | 41                               | 1.0             |             |                                |                          |                               |  |
| INYKLLNINLI  | 11     | Kb               | 94                               | 1.0             |             |                                |                          |                               |  |
| YKLLNINL     | 8      | Db               | 669                              | 1.0             |             |                                |                          |                               |  |
| YKLLNINLI    | 9      | Db               | 187                              | 1.0             |             |                                |                          |                               |  |
| LNINLINTQL   | 10     | Kb               | 386                              | 1.0             |             |                                |                          |                               |  |
| INLINTQL     | 8      | Kb               | 903                              | 1.0             |             |                                |                          |                               |  |
| NKYLGVPIFLL  | 11     | Kb               | 912                              | 1.1             | 89255570    | ferrous iron transport protein |                          |                               |  |
| KYLGVPFIFL   | 9      | Kd               | 24                               | 1.1             |             |                                |                          |                               |  |
| KYLGVPFIFLL  | 10     | Kd               | 139                              | 1.1             |             |                                |                          |                               |  |
| KYLGVPFIFLLM | 11     | Kd               | 506                              | 1.1             |             |                                |                          |                               |  |
| LGVPIFLLMM   | 10     | Kb               | 741                              | 1.1             |             |                                |                          |                               |  |
| GVPIFLLMM    | 9      | Kb               | 877                              | 1.1             |             |                                |                          |                               |  |
| GVPIFLLMMYL  | 11     | Kb               | 528                              | 1.1             |             |                                |                          |                               |  |
| VPIFLLMMYL   | 10     | Kb               | 355                              | 1.1             |             |                                |                          |                               |  |
| VPIFLLMMYLM  | 11     | Kb               | 775                              | 1.1             |             |                                |                          |                               |  |
| PIFLLMMYL    | 9      | Kb               | 451                              | 1.1             |             |                                |                          |                               |  |
| PIFLLMMYLM   | 10     | Kb               | 795                              | 1.1             |             |                                |                          |                               |  |
| IFLLMMYLM    | 9      | Kb               | 627                              | 1.1             |             |                                |                          |                               |  |
| IFLLMMYLMFL  | 11     | Kb               | 542                              | 1.1             |             |                                |                          |                               |  |
| FLMMYLM      | 8      | Db               | 327                              | 1.1             |             |                                |                          |                               |  |
| FLMMYLMFL    | 10     | Db               | 152                              | 1.1             |             |                                |                          |                               |  |
| LLMMYLMFL    | 9      | Kb               | 578                              | 1.1             |             |                                |                          |                               |  |
| LMMYLMFLFSI  | 11     | Kb               | 260                              | 1.1             |             |                                |                          |                               |  |
| MMYLMFLFSI   | 10     | Kb               | 54                               | 1.1             |             |                                |                          |                               |  |
| MYLMFLFSI    | 9      | Kd               | 89                               | 1.1             |             |                                |                          |                               |  |
| MYLMFLFSITL  | 11     | Kb               | 88                               | 1.1             |             |                                |                          |                               |  |
| YLMFLFSITL   | 10     | Kb               | 519                              | 1.1             |             |                                |                          |                               |  |
| LMFLFSITL    | 9      | Kb               | 20                               | 1.1             | 89255591    | phosphate transport protein    |                          |                               |  |
| ISSYQNV      | 8      | Kb               | 26                               | 1.0             |             |                                |                          |                               |  |
| ISSYQNVSYM   | 11     | Kb               | 161                              | 1.0             |             |                                |                          |                               |  |

| Sequence    | Length | Predicted allele | Affinity (IC <sub>50</sub> , nM) | Cluster density | Protein gi# | Protein annotation                                  | Responder <sup>(a)</sup> |
|-------------|--------|------------------|----------------------------------|-----------------|-------------|-----------------------------------------------------|--------------------------|
| SSSQNVSY    | 9      | Dd               | 785                              | 1.0             |             |                                                     |                          |
| SSSQNVSYM   | 10     | Kb               | 287                              | 1.0             |             |                                                     |                          |
| SSSQNVSYM   | 9      | Db               | 6                                | 1.0             |             |                                                     | L                        |
| SSSQNVSYM   | 11     | Db               | 30                               | 1.0             |             |                                                     |                          |
| SYQNVSYM    | 8      | Kd               | 116                              | 1.0             |             |                                                     |                          |
| SYQNVSYM    | 10     | Kd               | 175                              | 1.0             |             |                                                     |                          |
| SYQNVSYM    | 11     | Kd               | 62                               | 1.0             |             |                                                     |                          |
| QNVSYM      | 8      | Kb               | 582                              | 1.0             |             |                                                     |                          |
| VSMTVVNKV   | 10     | Kb               | 170                              | 1.0             |             |                                                     |                          |
| VSMTVVNKV   | 11     | Kb               | 47                               | 1.0             |             |                                                     |                          |
| VSMTVVNKV   | 9      | Kd               | 34                               | 1.0             |             |                                                     |                          |
| VSMTVVNKV   | 10     | Kd               | 20                               | 1.0             |             |                                                     |                          |
| VSMTVVNKV   | 11     | Kd               | 11                               | 1.0             |             |                                                     |                          |
| MTVVNKVLI   | 9      | Db               | 202                              | 1.0             |             |                                                     |                          |
| MTVVNKVLIPM | 11     | Db               | 180                              | 1.0             |             |                                                     |                          |
| TVVNVKVLIPM | 10     | Kb               | 338                              | 1.0             |             |                                                     |                          |
| SSFMYLHF    | 8      | Kb               | 29                               | 1.0             | 89255714    | hypothetical protein                                |                          |
| SSFMYLHFNYI | 11     | Kb               | 45                               | 1.0             |             |                                                     |                          |
| SFMYLHFNYI  | 10     | Kd               | 928                              | 1.0             |             |                                                     |                          |
| FMYLHFNYI   | 9      | Db               | 17                               | 1.0             |             |                                                     |                          |
| FMYLHFNYI   | 10     | Kb               | 53                               | 1.0             |             |                                                     |                          |
| FMYLHFNYLI  | 11     | Db               | 15                               | 1.0             |             |                                                     |                          |
| MYLHFNYI    | 8      | Kd               | 207                              | 1.0             |             |                                                     |                          |
| YLHFNYI     | 8      | Db               | 233                              | 1.0             |             |                                                     |                          |
| YLHFNYLI    | 9      | Db               | 15                               | 1.0             |             |                                                     |                          |
| YLHFNYLII   | 10     | Db               | 167                              | 1.0             |             |                                                     |                          |
| LHFNYLI     | 8      | Kb               | 552                              | 1.0             |             |                                                     |                          |
| LHFNYLII    | 11     | Kb               | 97                               | 1.0             |             |                                                     |                          |
| FNYLII      | 9      | Kb               | 54                               | 1.0             |             |                                                     |                          |
| NYLII       | 8      | Kd               | 298                              | 1.0             |             |                                                     |                          |
| IALTFCAI    | 8      | Kb               | 397                              | 1.0             |             |                                                     |                          |
| IALTFCAI    | 11     | Kb               | 460                              | 1.0             |             |                                                     |                          |
| LTFCAI      | 9      | Kb               | 548                              | 1.0             |             |                                                     |                          |
| TFCAI       | 8      | Kd               | 201                              | 1.0             | 89255715    | aromatic amino acid transporter of the HAAAP family | M                        |
| RVLNLLFY    | 9      | Kb               | 552                              | 1.0             |             |                                                     |                          |
| RVLNLLFY    | 10     | Kb               | 626                              | 1.0             |             |                                                     |                          |
| RVLNLLFY    | 11     | Kb               | 444                              | 1.0             |             |                                                     |                          |
| LNLLFY      | 8      | Kb               | 24                               | 1.0             |             |                                                     |                          |
| LNLLFY      | 9      | Kb               | 58                               | 1.0             |             |                                                     |                          |
| LNLLFY      | 10     | Kb               | 108                              | 1.0             |             |                                                     |                          |
| LLFY        | 11     | Kb               | 82                               | 1.0             |             |                                                     |                          |
| LFY         | 10     | Kb               | 70                               | 1.0             |             |                                                     |                          |
| LFY         | 11     | Kb               | 111                              | 1.0             |             |                                                     |                          |
| FY          | 9      | Kd               | 15                               | 1.0             |             |                                                     |                          |
| FY          | 10     | Kd               | 21                               | 1.0             |             |                                                     |                          |
| Y           | 9      | Kb               | 444                              | 1.0             |             |                                                     |                          |
| L           | 8      | Kb               | 304                              | 1.0             |             |                                                     |                          |
| L           | 10     | Kb               | 416                              | 1.0             |             |                                                     |                          |
| L           | 9      | Kd               | 498                              | 1.0             |             |                                                     |                          |
| Y           | 8      | Db               | 19                               | 1.0             |             |                                                     |                          |
| Y           | 9      | Db               | 728                              | 1.0             |             |                                                     | L                        |
| Y           | 10     | Db               | 6                                | 1.0             |             |                                                     | H                        |
| S           | 9      | Db               | 49                               | 1.0             |             |                                                     |                          |
| L           | 11     | Kb               | 729                              | 1.0             |             |                                                     | L                        |
| T           | 10     | Kb               | 31                               | 1.0             |             |                                                     |                          |
| A           | 9      | Kd               | 14                               | 1.0             |             |                                                     |                          |
| M           | 8      | Kb               | 326                              | 1.0             | 89255729    | hypothetical membrane protein                       |                          |
| M           | 10     | Kb               | 142                              | 1.0             |             |                                                     |                          |
| M           | 11     | Kb               | 943                              | 1.0             |             |                                                     |                          |
| A           | 9      | Kb               | 771                              | 1.0             |             |                                                     |                          |
| L           | 8      | Kb               | 140                              | 1.0             |             |                                                     | M                        |
| L           | 9      | Kb               | 525                              | 1.0             |             |                                                     |                          |
| L           | 10     | Kb               | 135                              | 1.0             |             |                                                     |                          |
| L           | 11     | Kb               | 102                              | 1.0             |             |                                                     |                          |
| F           | 8      | Db               | 984                              | 1.0             |             |                                                     |                          |
| F           | 9      | Kb               | 328                              | 1.0             |             |                                                     |                          |
| S           | 11     | Kd               | 135                              | 1.0             |             |                                                     |                          |
| V           | 9      | Kb               | 464                              | 1.0             |             |                                                     | L                        |
| V           | 10     | Kb               | 803                              | 1.0             |             |                                                     |                          |
| I           | 8      | Kb               | 550                              | 1.0             |             |                                                     |                          |
| I           | 9      | Kb               | 314                              | 1.0             |             |                                                     |                          |
| I           | 11     | Db               | 151                              | 1.0             |             |                                                     |                          |
| V           | 9      | Db               | 21                               | 1.0             |             |                                                     |                          |
| T           | 9      | Kb               | 510                              | 1.0             |             |                                                     |                          |
| T           | 11     | Kb               | 41                               | 1.0             |             |                                                     |                          |
| G           | 10     | Kb               | 988                              | 1.0             |             |                                                     | M                        |
| L           | 9      | Kb               | 45                               | 1.0             |             |                                                     |                          |
| L           | 10     | Kb               | 110                              | 1.0             |             |                                                     |                          |
| L           | 8      | Kd               | 269                              | 1.0             |             |                                                     |                          |
| L           | 9      | Kd               | 632                              | 1.0             |             |                                                     |                          |
| Y           | 8      | Kb               | 703                              | 1.0             |             |                                                     |                          |
| L           | 10     | Kb               | 305                              | 1.2             | 89255776    | 4-hydroxybenzoate octaprenyltransferase             |                          |
| T           | 9      | Kb               | 383                              | 1.2             |             |                                                     |                          |
| V           | 9      | Kb               | 296                              | 1.0             |             |                                                     |                          |
| V           | 11     | Kb               | 126                              | 1.0             |             |                                                     |                          |
| I           | 8      | Kb               | 101                              | 1.0             |             |                                                     |                          |
| I           | 11     | Db               | 553                              | 1.0             |             |                                                     |                          |
| C           | 10     | Db               | 466                              | 1.0             |             |                                                     |                          |
| C           | 11     | Kb               | 114                              | 1.0             |             |                                                     |                          |
| V           | 9      | Db               | 31                               | 1.0             |             |                                                     |                          |
| V           | 10     | Kb               | 122                              | 1.0             |             |                                                     |                          |
| V           | 11     | Kb               | 106                              | 1.0             |             |                                                     | L                        |
| F           | 9      | Kd               | 368                              | 1.0             |             |                                                     |                          |
| F           | 10     | Kb               | 366                              | 1.0             |             |                                                     |                          |
| L           | 9      | Kd               | 250                              | 1.0             |             |                                                     |                          |
| L           | 11     | Kd               | 135                              | 1.0             |             |                                                     |                          |
| Y           | 10     | Kb               | 406                              | 1.0             |             |                                                     |                          |

| Sequence     | Length | Predicted allele | Affinity (IC <sub>50</sub> , nM) | Cluster density | Protein gi# | Protein annotation                                    | Responder <sup>(a)</sup> |
|--------------|--------|------------------|----------------------------------|-----------------|-------------|-------------------------------------------------------|--------------------------|
| TILLSFVAL    | 9      | Kb               | 59                               | 1.0             |             |                                                       |                          |
| TILLSFVALFL  | 11     | Kb               | 584                              | 1.0             |             |                                                       |                          |
| ILLSFVAL     | 8      | Kb               | 118                              | 1.0             |             |                                                       |                          |
| ILLSFVALFL   | 10     | Kb               | 517                              | 1.0             |             |                                                       |                          |
| LSFVALFL     | 8      | Kb               | 545                              | 1.0             |             |                                                       |                          |
| LSFVALFLAI   | 10     | Kb               | 645                              | 1.0             |             |                                                       |                          |
| LSFVALFLAIL  | 11     | Kb               | 149                              | 1.0             |             |                                                       |                          |
| FVALFLAIL    | 9      | Kb               | 567                              | 1.0             |             |                                                       |                          |
| VALFLAIL     | 8      | Kb               | 494                              | 1.0             |             |                                                       |                          |
| VALFLAILYP   | 10     | Kb               | 684                              | 1.0             |             |                                                       |                          |
| NKVFRIYLL    | 9      | Kb               | 453                              | 1.0             |             |                                                       |                          |
| KVFRYLL      | 8      | Kb               | 22                               | 1.0             |             |                                                       |                          |
| FRYLLFNFL    | 10     | Kb               | 182                              | 1.0             |             |                                                       |                          |
| RYLLFNFL     | 9      | Kd               | 17                               | 1.0             |             |                                                       |                          |
| RYLLFNFLSL   | 11     | Kd               | 48                               | 1.0             |             |                                                       |                          |
| YLLFNFL      | 8      | Kb               | 197                              | 1.0             |             |                                                       |                          |
| YLLFNFLSL    | 10     | Kb               | 228                              | 1.0             |             |                                                       |                          |
| YLLFNFLSLL   | 11     | Kb               | 445                              | 1.0             |             |                                                       |                          |
| ILLFNFLSL    | 9      | Kb               | 47                               | 1.0             |             |                                                       |                          |
| ILLFNFLSLL   | 10     | Kb               | 111                              | 1.0             |             |                                                       |                          |
| ILLFNFLSLLL  | 11     | Kb               | 284                              | 1.0             |             |                                                       |                          |
| LLFNFLSL     | 8      | Kb               | 329                              | 1.0             |             |                                                       |                          |
| LLFNFLSLL    | 9      | Kb               | 140                              | 1.0             |             |                                                       |                          |
| LLFNFLSLLL   | 10     | Kb               | 302                              | 1.0             |             |                                                       |                          |
| LLFNFLSLLL   | 11     | Kb               | 280                              | 1.0             |             |                                                       |                          |
| LSLLLII      | 8      | Db               | 993                              | 1.2             |             |                                                       |                          |
| LSLLLIIH     | 9      | Kb               | 79                               | 1.2             |             |                                                       |                          |
| LSLLLIIHGI   | 11     | Kb               | 812                              | 1.1             |             |                                                       |                          |
| PTMKKYYYNTL  | 11     | Kb               | 102                              | 1.1             | 89255853    | major facilitator superfamily (MFS) transport protein |                          |
| TMKKYYYNTL   | 10     | Kb               | 36                               | 1.1             |             |                                                       |                          |
| MKKYYYNTL    | 9      | Kb               | 45                               | 1.1             |             |                                                       |                          |
| KKYYYNTL     | 8      | Kb               | 218                              | 1.1             |             |                                                       |                          |
| KKYYYNTLIH   | 11     | Kb               | 163                              | 1.1             |             |                                                       |                          |
| KYYYNTLI     | 8      | Kd               | 90                               | 1.1             |             |                                                       |                          |
| KYYYNTLIH    | 9      | Db               | 301                              | 1.1             |             |                                                       |                          |
| KYYYNTLIH    | 10     | Kb               | 208                              | 1.1             |             |                                                       |                          |
| KYYYNTLIHLL  | 11     | Kb               | 156                              | 1.1             |             |                                                       |                          |
| YYNTLIH      | 8      | Kd               | 696                              | 1.1             |             |                                                       |                          |
| YYNTLIH      | 9      | Kb               | 319                              | 1.1             |             |                                                       |                          |
| YYNTLIHLL    | 10     | Kb               | 243                              | 1.1             |             |                                                       |                          |
| YYNTLIHLL    | 11     | Kb               | 454                              | 1.1             |             |                                                       |                          |
| YYNTLIH      | 8      | Kd               | 86                               | 1.1             |             |                                                       |                          |
| YYNTLIHLL    | 9      | Kd               | 214                              | 1.1             |             |                                                       |                          |
| YYNTLIHLL    | 10     | Kd               | 479                              | 1.1             |             |                                                       |                          |
| LIHLLFFL     | 9      | Kb               | 806                              | 1.1             |             |                                                       |                          |
| LIHLLFFLAL   | 11     | Kb               | 180                              | 1.1             |             |                                                       |                          |
| IILHLLFFLAL  | 10     | Kb               | 41                               | 1.1             |             |                                                       |                          |
| IILHLLFFLALL | 11     | Kb               | 65                               | 1.1             |             |                                                       |                          |
| ILLFFLAL     | 9      | Kb               | 42                               | 1.1             |             |                                                       |                          |
| ILLFFLALL    | 10     | Kb               | 66                               | 1.1             |             |                                                       |                          |
| LLFFLALL     | 9      | Kb               | 116                              | 1.1             |             |                                                       |                          |
| FFLALLNYV    | 9      | Kd               | 189                              | 1.1             |             |                                                       |                          |
| GGFVIGFYSIL  | 11     | Kb               | 877                              | 1.0             |             |                                                       |                          |
| FVIGFYSI     | 8      | Kb               | 243                              | 1.0             |             |                                                       |                          |
| FVIGFYSIL    | 9      | Kb               | 307                              | 1.0             |             |                                                       |                          |
| FVIGFYSILL   | 10     | Kb               | 431                              | 1.0             |             |                                                       |                          |
| VIGFYSIL     | 8      | Kb               | 755                              | 1.0             |             |                                                       |                          |
| VIGFYSILL    | 9      | Kb               | 598                              | 1.0             |             |                                                       |                          |
| IGFYSILL     | 8      | Kb               | 599                              | 1.0             |             |                                                       | L                        |
| IGFYSILLTRI  | 11     | Kb               | 191                              | 1.0             |             |                                                       |                          |
| GFYSILLTRI   | 10     | Kd               | 659                              | 1.0             |             |                                                       |                          |
| FYSILLTRI    | 9      | Kd               | 14                               | 1.0             |             |                                                       |                          |
| FYSILLTRIL   | 10     | Kd               | 726                              | 1.0             |             |                                                       | M                        |
| FYSILLTRILL  | 11     | Kd               | 284                              | 1.0             |             |                                                       |                          |
| YSILLTRI     | 8      | Db               | 402                              | 1.0             |             |                                                       |                          |
| YSILLTRIL    | 9      | Kb               | 816                              | 1.0             |             |                                                       |                          |
| YSILLTRILL   | 10     | Db               | 229                              | 1.0             |             |                                                       |                          |
| SILLTRILL    | 9      | Kb               | 215                              | 1.0             |             |                                                       |                          |
| SILLTRILLGL  | 11     | Kb               | 364                              | 1.0             |             |                                                       |                          |
| ILLTRILLGL   | 10     | Kb               | 948                              | 1.0             |             |                                                       |                          |
| LALFFFFFL    | 10     | Kb               | 27                               | 1.1             | 89255996    | Membrane protein/O-antigen protein                    | L                        |
| AFLFFFFFL    | 9      | Kb               | 214                              | 1.1             |             |                                                       |                          |
| AFLFFFFFLSM  | 11     | Kb               | 81                               | 1.1             |             |                                                       |                          |
| FLFFFFFLSM   | 10     | Kb               | 69                               | 1.1             |             |                                                       |                          |
| FLFFFFFLSMI  | 11     | Kb               | 595                              | 1.1             |             |                                                       |                          |
| LFFFFFLSM    | 9      | Kb               | 44                               | 1.1             |             |                                                       |                          |
| LFFFFFLSMI   | 10     | Kb               | 461                              | 1.1             |             |                                                       |                          |
| FFFFFLSMI    | 9      | Kd               | 712                              | 1.1             |             |                                                       |                          |
| FFFFFLSMIYL  | 11     | Kb               | 253                              | 1.1             |             |                                                       |                          |
| FFFLSMIYL    | 10     | Kb               | 659                              | 1.1             |             |                                                       |                          |
| FFFLSMIYL    | 9      | Db               | 272                              | 1.1             |             |                                                       |                          |
| FFLSMIYL     | 8      | Kd               | 249                              | 1.1             |             |                                                       |                          |
| FFLSMIYLI    | 9      | Kd               | 814                              | 1.1             |             |                                                       |                          |
| LSMIYLIIVQI  | 11     | Kb               | 562                              | 1.1             |             |                                                       |                          |
| SMIYLIIVQI   | 10     | Kb               | 330                              | 1.1             |             |                                                       |                          |
| SMIYLIIVQII  | 11     | Kb               | 812                              | 1.1             |             |                                                       |                          |
| MIYLIIVQI    | 9      | Kb               | 360                              | 1.1             |             |                                                       |                          |
| MIYLIIVQII   | 10     | Kb               | 881                              | 1.1             |             |                                                       |                          |
| MIYLIIVQIIL  | 11     | Kb               | 109                              | 1.1             |             |                                                       |                          |
| IYLIIVQI     | 8      | Kd               | 279                              | 1.1             |             |                                                       |                          |
| IYLIIVQIIL   | 10     | Kb               | 689                              | 1.1             |             |                                                       |                          |
| IYLIIVQIILL  | 11     | Kb               | 372                              | 1.1             |             |                                                       |                          |
| LIIVQIILL    | 9      | Kb               | 910                              | 1.1             |             |                                                       | L                        |
| VQIILLDAASL  | 11     | Kb               | 94                               | 1.1             |             |                                                       |                          |
| QIILLDAASL   | 10     | Kb               | 924                              | 1.1             |             |                                                       |                          |
| IILLDAASL    | 9      | Kb               | 118                              | 1.1             |             |                                                       |                          |
| IGYKYLYYG    | 11     | Kb               | 398                              | 1.0             |             |                                                       | M                        |

| Sequence    | Length | Predicted allele | Affinity (IC <sub>50</sub> , nM) | Cluster density | Protein gi# | Protein annotation                      | Responder <sup>(a)</sup> |
|-------------|--------|------------------|----------------------------------|-----------------|-------------|-----------------------------------------|--------------------------|
| GYKLYYYGI   | 11     | Kd               | 547                              | 1.1             |             |                                         |                          |
| IKLYYYGI    | 9      | Kb               | 48                               | 1.1             |             |                                         |                          |
| IKLYYYGII   | 10     | Kb               | 97                               | 1.1             |             |                                         |                          |
| KYLYYYGI    | 8      | Kd               | 430                              | 1.1             |             |                                         |                          |
| KYLYYYGII   | 9      | Kd               | 303                              | 1.1             |             |                                         |                          |
| YLYYYGIIFSM | 11     | Kb               | 124                              | 1.1             |             |                                         |                          |
| LYYYGIIFSM  | 10     | Kb               | 45                               | 1.1             |             |                                         |                          |
| YYYGIIIFSM  | 9      | Kb               | 522                              | 1.1             |             |                                         |                          |
| YGIIFSMFFYI | 11     | Db               | 383                              | 1.1             |             |                                         |                          |
| IIFSMFFYI   | 9      | Kb               | 189                              | 1.1             |             |                                         |                          |
| IIFSMFFYIL  | 10     | Kb               | 50                               | 1.1             |             |                                         |                          |
| IIFSMFFYILI | 11     | Kb               | 135                              | 1.1             |             |                                         |                          |
| IIFSMFFYIL  | 9      | Kb               | 821                              | 1.0             |             |                                         | M                        |
| FSMFFYIL    | 8      | Kb               | 30                               | 1.1             |             |                                         |                          |
| FSMFFYILI   | 9      | Db               | 91                               | 1.1             |             |                                         |                          |
| FSMFFYILII  | 10     | Db               | 163                              | 1.1             |             |                                         |                          |
| SMFFYILI    | 8      | Kb               | 301                              | 1.1             |             |                                         |                          |
| SMFFYILII   | 9      | Kb               | 269                              | 1.1             |             |                                         |                          |
| SMFFYILIIFL | 11     | Kb               | 33                               | 1.1             |             |                                         |                          |
| MFFYILIIFL  | 10     | Kb               | 410                              | 1.1             |             |                                         |                          |
| FFYILIIFL   | 9      | Kb               | 505                              | 1.1             |             |                                         |                          |
| FYILIIFL    | 8      | Kd               | 58                               | 1.1             |             |                                         |                          |
| YLIIFLYFEM  | 11     | Kb               | 957                              | 1.1             |             |                                         |                          |
| LIIFLYFEM   | 10     | Kb               | 297                              | 1.0             |             |                                         | L                        |
| LIIFLYFEM   | 9      | Kb               | 198                              | 1.1             |             |                                         |                          |
| IIFLYFEM    | 8      | Kb               | 78                               | 1.0             |             |                                         | M                        |
| LYFEMRKCFI  | 10     | Kd               | 21                               | 1.1             |             |                                         |                          |
| LFICYVSTNI  | 10     | Kd               | 822                              | 1.0             | 89256001    | O-antigen flippase                      |                          |
| ICVYSTNIM   | 9      | Kb               | 176                              | 1.0             |             |                                         | H                        |
| CVYSTNIM    | 8      | Kd               | 146                              | 1.0             |             |                                         | M                        |
| YVSTNIMYYFV | 11     | Db               | 339                              | 1.0             |             |                                         |                          |
| STNIMYYFV   | 9      | Db               | 988                              | 1.0             |             |                                         |                          |
| TNIMYYFV    | 8      | Kb               | 44                               | 1.0             |             |                                         |                          |
| NIMYYFVYQTI | 11     | Kb               | 830                              | 1.0             |             |                                         |                          |
| IMYYFVYQT   | 9      | Kb               | 702                              | 1.0             |             |                                         |                          |
| IMYYFVYQTI  | 10     | Kb               | 15                               | 1.0             |             |                                         |                          |
| IMYYFVYQTI  | 11     | Kb               | 48                               | 1.0             |             |                                         |                          |
| MYYFVYQT    | 8      | Kb               | 812                              | 1.0             |             |                                         |                          |
| MYYFVYQTI   | 9      | Kb               | 177                              | 1.0             |             |                                         |                          |
| MYYFVYQTI   | 10     | Kd               | 132                              | 1.0             |             |                                         |                          |
| YFVYQTI     | 8      | Kd               | 82                               | 1.0             |             |                                         |                          |
| YFVYQTI     | 9      | Kd               | 23                               | 1.0             |             |                                         |                          |
| YFVYQTI     | 11     | Kd               | 85                               | 1.0             |             |                                         |                          |
| FVYQTI      | 9      | Kb               | 135                              | 1.0             |             |                                         |                          |
| FVYQTI      | 10     | Kb               | 65                               | 1.0             |             |                                         |                          |
| VYQTI       | 8      | Kd               | 98                               | 1.0             |             |                                         |                          |
| VYQTI       | 9      | Kd               | 409                              | 1.0             |             |                                         |                          |
| VYQTI       | 11     | Kd               | 555                              | 1.0             |             |                                         |                          |
| IAILVLCI    | 9      | Db               | 153                              | 1.1             |             |                                         |                          |
| IAILVLCIAI  | 11     | Db               | 260                              | 1.0             |             |                                         |                          |
| ILVLCIAI    | 9      | Kb               | 790                              | 1.1             |             |                                         |                          |
| LYLVCIAI    | 8      | Kd               | 99                               | 1.1             |             |                                         |                          |
| AIIFLKEKVS  | 11     | Kb               | 193                              | 1.0             | 89256054    | conserved hypothetical membrane protein |                          |
| IIFLKEKVS   | 10     | Kb               | 67                               | 1.0             |             |                                         |                          |
| IFLKEKVS    | 9      | Kb               | 518                              | 1.0             |             |                                         |                          |
| VSLKYFV     | 8      | Kb               | 7                                | 1.0             |             |                                         |                          |
| VSLKYFV     | 9      | Kb               | 19                               | 1.0             |             |                                         |                          |
| VSLKYFV     | 10     | Kb               | 14                               | 1.0             |             |                                         | L                        |
| VSLKYFV     | 11     | Kb               | 28                               | 1.0             |             |                                         |                          |
| SLKYFV      | 9      | Kb               | 306                              | 1.0             |             |                                         |                          |
| SLKYFV      | 10     | Kb               | 762                              | 1.0             |             |                                         |                          |
| LKYFV       | 8      | Kb               | 239                              | 1.0             |             |                                         | M                        |
| LKYFV       | 9      | Kb               | 29                               | 1.0             |             |                                         |                          |
| KYFV        | 8      | Kb               | 757                              | 1.0             |             |                                         |                          |
| KYFV        | 11     | Kd               | 167                              | 1.0             |             |                                         |                          |
| YFV         | 10     | Kd               | 165                              | 1.0             |             |                                         |                          |
| FV          | 8      | Db               | 379                              | 1.0             |             |                                         |                          |
| FV          | 10     | Kb               | 663                              | 1.0             |             |                                         |                          |
| FV          | 11     | Kb               | 719                              | 1.0             |             |                                         |                          |
| VLLAFGL     | 9      | Kb               | 502                              | 1.0             |             |                                         |                          |
| VLLAFGLL    | 10     | Kb               | 518                              | 1.0             |             |                                         |                          |
| VLLAFGLLL   | 11     | Kb               | 966                              | 1.0             |             |                                         |                          |
| LLAFGL      | 8      | Kb               | 865                              | 1.0             |             |                                         |                          |
| LLAFGLL     | 9      | Kb               | 590                              | 1.0             |             |                                         |                          |
| LLAFGLLL    | 11     | Kb               | 844                              | 1.0             |             |                                         |                          |
| LAFLGLL     | 9      | Kb               | 187                              | 1.1             |             |                                         |                          |
| LAFLGLLLM   | 10     | Kb               | 214                              | 1.0             |             |                                         |                          |
| LLLLMSQAGL  | 10     | Kb               | 515                              | 1.1             |             |                                         |                          |
| LLLLMSQAGL  | 9      | Kb               | 727                              | 1.1             |             |                                         |                          |
| ITAFIFSV    | 9      | Kb               | 836                              | 1.2             | 89256057    | hypothetical protein                    |                          |
| ITAFIFSVL   | 10     | Kb               | 156                              | 1.2             |             |                                         |                          |
| TAFIFSV     | 8      | Kb               | 96                               | 1.2             |             |                                         |                          |
| TAFIFSVL    | 9      | Kb               | 27                               | 1.2             |             |                                         |                          |
| TSVLGYVVV   | 10     | Db               | 98                               | 1.2             |             |                                         |                          |
| TSVLGYVVVM  | 11     | Db               | 28                               | 1.2             |             |                                         |                          |
| SVLGYVVV    | 9      | Kb               | 736                              | 1.2             |             |                                         |                          |
| SVLGYVVVM   | 10     | Kb               | 97                               | 1.2             |             |                                         |                          |
| SVLGYVVVMI  | 11     | Kb               | 280                              | 1.2             |             |                                         |                          |
| VLGYVVVM    | 9      | Kb               | 305                              | 1.2             |             |                                         |                          |
| VLGYVVVMI   | 10     | Kb               | 916                              | 1.2             |             |                                         |                          |
| VLGYVVVMIL  | 11     | Kb               | 496                              | 1.2             |             |                                         |                          |
| LGYYVVM     | 8      | Kb               | 24                               | 1.2             |             |                                         |                          |
| LGYYVVM     | 9      | Kb               | 14                               | 1.2             |             |                                         |                          |
| LGYYVVMIL   | 10     | Kb               | 9                                | 1.2             |             |                                         |                          |
| LGYYVVMILA  | 11     | Kb               | 307                              | 1.2             |             |                                         |                          |
| GYYVVM      | 8      | Kb               | 838                              | 1.2             |             |                                         |                          |
| GYYVVMIL    | 9      | Kb               | 177                              | 1.2             |             |                                         |                          |

| Sequence    | Length | Predicted allele | Affinity (IC <sub>50</sub> , nM) | Cluster density | Protein gi# | Protein annotation                                                  | Responder <sup>(a)</sup> |
|-------------|--------|------------------|----------------------------------|-----------------|-------------|---------------------------------------------------------------------|--------------------------|
| YYYYVMIL    | 8      | Kb               | 709                              | 1.2             |             |                                                                     |                          |
| YYYYMILAV   | 10     | Kd               | 967                              | 1.2             |             |                                                                     |                          |
| YYYYMILAV   | 9      | Kd               | 701                              | 1.2             |             |                                                                     |                          |
| YYYYMILAVAI | 11     | Kd               | 98                               | 1.2             |             |                                                                     |                          |
| YVVMILAV    | 8      | Kd               | 258                              | 1.2             |             |                                                                     |                          |
| YVVMILAVAI  | 10     | Kd               | 25                               | 1.2             |             |                                                                     |                          |
| VAISVFITASI | 11     | Kb               | 259                              | 1.0             |             |                                                                     |                          |
| ISVFITASI   | 9      | Kb               | 195                              | 1.0             |             |                                                                     |                          |
| SVFITASI    | 8      | Kb               | 715                              | 1.0             |             |                                                                     |                          |
| QSAHFHTLYL  | 10     | Kb               | 668                              | 1.0             | 89256070    | polyamine transporter, subunit H, ABC transporter, membrane protein | L                        |
| SALHFTLYL   | 9      | Kb               | 57                               | 1.0             |             |                                                                     |                          |
| LHFTLYLSNYI | 11     | Kb               | 907                              | 1.0             |             |                                                                     |                          |
| FTLYLSNYI   | 9      | Kb               | 463                              | 1.0             |             |                                                                     |                          |
| FTLYLSNYIEL | 11     | Kb               | 103                              | 1.0             |             |                                                                     |                          |
| TLYLSNYIEL  | 10     | Kb               | 139                              | 1.0             |             |                                                                     |                          |
| TYLSNYIELI  | 11     | Kb               | 956                              | 1.0             |             |                                                                     |                          |
| LYLSNYIEL   | 9      | Db               | 25                               | 1.0             |             |                                                                     |                          |
| LYLSNYIELI  | 10     | Kd               | 249                              | 1.0             |             |                                                                     |                          |
| SNYELIHYNL  | 11     | Kb               | 124                              | 1.0             |             |                                                                     |                          |
| NYELIHYNL   | 10     | Kd               | 941                              | 1.0             |             |                                                                     |                          |
| NYELIHYNLI  | 11     | Kd               | 783                              | 1.0             |             |                                                                     |                          |
| IELIHYNL    | 8      | Kb               | 580                              | 1.0             |             |                                                                     |                          |
| IELIHYNLI   | 9      | Kb               | 456                              | 1.0             |             |                                                                     |                          |
| IELIHYNLIFI | 11     | Db               | 849                              | 1.0             |             |                                                                     |                          |
| LIHYNLIFI   | 9      | Db               | 57                               | 1.0             |             |                                                                     |                          |
| LIHYNLIFISL | 11     | Kb               | 80                               | 1.0             |             |                                                                     | M                        |
| IHNLIIFI    | 8      | Kb               | 493                              | 1.0             |             |                                                                     | L                        |
| IHNLIIFISL  | 10     | Kb               | 21                               | 1.0             |             |                                                                     | L                        |
| IHNLIIFISLL | 11     | Kb               | 47                               | 1.0             |             |                                                                     |                          |
| HYNLIFISL   | 9      | Kd               | 34                               | 1.1             |             |                                                                     |                          |
| HYNLIFISLL  | 10     | Kd               | 75                               | 1.0             |             |                                                                     |                          |
| YNLIIFISL   | 8      | Kb               | 40                               | 1.1             |             |                                                                     |                          |
| YNLIIFISLL  | 9      | Kb               | 247                              | 1.1             |             |                                                                     |                          |
| TTSMTNRRSL  | 11     | Kb               | 837                              | 1.0             | 89256087    | hypothetical protein                                                |                          |
| ITSMTNRRSL  | 10     | Kb               | 825                              | 1.0             |             |                                                                     |                          |
| ITSMTNRRSLL | 11     | Kb               | 951                              | 1.0             |             |                                                                     |                          |
| TSMTNRRSL   | 9      | Db               | 298                              | 1.0             |             |                                                                     |                          |
| TSMTNRRSLL  | 10     | Db               | 184                              | 1.0             |             |                                                                     |                          |
| SMTNRRSLL   | 9      | Kb               | 577                              | 1.0             |             |                                                                     |                          |
| RSLKYFFV    | 9      | Db               | 115                              | 1.0             |             |                                                                     |                          |
| RSLKYFFVL   | 10     | Db               | 84                               | 1.0             |             |                                                                     |                          |
| RSLKYFFVLL  | 11     | Kb               | 79                               | 1.0             |             |                                                                     | L                        |
| SLLKYFFVL   | 9      | Kb               | 218                              | 1.0             |             |                                                                     | L                        |
| SLLKYFFVLL  | 10     | Kb               | 96                               | 1.0             |             |                                                                     |                          |
| LLKYFFVLL   | 9      | Kb               | 248                              | 1.0             |             |                                                                     |                          |
| LKYFFVLL    | 8      | Kb               | 165                              | 1.0             |             |                                                                     |                          |
| LKYFFVLLI   | 9      | Kb               | 318                              | 1.0             |             |                                                                     |                          |
| LKYFFVLLIL  | 10     | Kb               | 93                               | 1.0             |             |                                                                     |                          |
| KYFFVLLI    | 8      | Kd               | 478                              | 1.0             |             |                                                                     |                          |
| KYFFVLLIL   | 9      | Kd               | 553                              | 1.0             |             |                                                                     |                          |
| KYFFVLLLIFI | 11     | Kd               | 303                              | 1.0             |             |                                                                     |                          |
| FVLLIFI     | 8      | Db               | 235                              | 1.0             |             |                                                                     |                          |
| ALYMFYFYSI  | 11     | Kb               | 339                              | 1.0             | 89256094    | hypothetical membrane protein                                       |                          |
| LYMFYFYF    | 8      | Kb               | 265                              | 1.0             |             |                                                                     |                          |
| LYMFYFYSI   | 10     | Kb               | 30                               | 1.0             |             |                                                                     |                          |
| LYMFYFYSII  | 11     | Kb               | 122                              | 1.0             |             |                                                                     |                          |
| IYMFYFYSI   | 9      | Kb               | 86                               | 1.0             |             |                                                                     |                          |
| IYMFYFYSII  | 10     | Kb               | 321                              | 1.0             |             |                                                                     |                          |
| YMFYFYSI    | 8      | Kb               | 768                              | 1.0             |             |                                                                     |                          |
| YMFYFYSII   | 9      | Kb               | 282                              | 1.0             |             |                                                                     |                          |
| FYSIISYI    | 10     | Kd               | 23                               | 1.0             |             |                                                                     |                          |
| FSIISYI     | 8      | Db               | 10                               | 1.0             |             |                                                                     |                          |
| ISYIINY     | 8      | Kb               | 549                              | 1.0             |             |                                                                     |                          |
| ISYIINYSS   | 9      | Kb               | 232                              | 1.0             |             |                                                                     |                          |
| ISYIINYSS   | 10     | Kb               | 676                              | 1.0             |             |                                                                     |                          |
| ISYIINYSSK  | 11     | Kb               | 656                              | 1.0             |             |                                                                     |                          |
| SYIINYSS    | 8      | Kb               | 766                              | 1.0             |             |                                                                     |                          |
| SYIINYSSKI  | 11     | Kb               | 697                              | 1.0             |             |                                                                     |                          |
| YIINYSSKI   | 10     | Kd               | 67                               | 1.0             |             |                                                                     |                          |
| YIINYSSK    | 8      | Kb               | 559                              | 1.0             |             |                                                                     |                          |
| IYNYSSKI    | 8      | Kd               | 475                              | 1.0             |             |                                                                     |                          |
| NGLEFFYAYI  | 10     | Kb               | 367                              | 1.0             | 89256124    | hypothetical membrane protein                                       |                          |
| LEFFYAYI    | 8      | Kb               | 420                              | 1.0             |             |                                                                     |                          |
| LEFFYAYIAFL | 11     | Kb               | 216                              | 1.0             |             |                                                                     |                          |
| EFFYAYIAFL  | 10     | Kb               | 724                              | 1.0             |             |                                                                     | L                        |
| FFYAYIAF    | 8      | Kb               | 675                              | 1.0             |             |                                                                     |                          |
| FFYAYIAFL   | 9      | Kb               | 277                              | 1.0             |             |                                                                     |                          |
| FFYAYIAFLIL | 11     | Kb               | 563                              | 1.0             |             |                                                                     |                          |
| FYAYIAFL    | 8      | Kd               | 391                              | 1.0             |             |                                                                     |                          |
| FYAYIAFLI   | 9      | Kd               | 855                              | 1.0             |             |                                                                     | L                        |
| YAYIAFLI    | 8      | Db               | 779                              | 1.0             |             |                                                                     |                          |
| YAYIAFLIL   | 9      | Kb               | 180                              | 1.0             |             |                                                                     |                          |
| YAYIAFLILL  | 10     | Kb               | 61                               | 1.0             |             |                                                                     |                          |
| AYIAFLIL    | 8      | Kd               | 847                              | 1.0             |             |                                                                     | L                        |
| AYIAFLILL   | 9      | Kb               | 244                              | 1.0             |             |                                                                     |                          |
| IAFLILLCYP  | 10     | Kb               | 346                              | 1.0             |             |                                                                     |                          |
| IAFLILLCYPM | 11     | Kb               | 48                               | 1.0             |             |                                                                     |                          |
| AFLILLCYPM  | 10     | Kb               | 885                              | 1.0             |             |                                                                     | M                        |
| FLILLCYPM   | 9      | Db               | 148                              | 1.0             |             |                                                                     | H                        |
| LCYPMNIAAL  | 10     | Kb               | 78                               | 1.0             |             |                                                                     | L                        |
| CYPMNIAAL   | 9      | Kb               | 64                               | 1.0             |             |                                                                     |                          |
| CYPMNIAALYF | 11     | Dd               | 757                              | 1.0             |             |                                                                     |                          |
| IKFMLLVIYI  | 10     | Kb               | 308                              | 1.0             | 89256142    | hypothetical membrane protein                                       |                          |
| IKFMLLVIYII | 11     | Kb               | 821                              | 1.0             |             |                                                                     |                          |
| FMLLVII     | 8      | Db               | 21                               | 1.0             |             |                                                                     |                          |
| FMLLVII     | 9      | Db               | 73                               | 1.0             |             |                                                                     |                          |
| FMLLVIIII   | 10     | Db               | 37                               | 1.0             |             |                                                                     |                          |

| Sequence     | Length | Predicted allele | Affinity (IC <sub>50</sub> , nM) | Cluster density | Protein gi# | Protein annotation                                           | Responder <sup>(a)</sup> |
|--------------|--------|------------------|----------------------------------|-----------------|-------------|--------------------------------------------------------------|--------------------------|
| FMLLVYIHL    | 11     | Db               | 75                               | 1.0             |             |                                                              |                          |
| MLLVYIHL     | 10     | Kb               | 949                              | 1.0             |             |                                                              |                          |
| LLVYIHL      | 9      | Kb               | 755                              | 1.0             |             |                                                              |                          |
| LVYIHLQYL    | 11     | Kb               | 107                              | 1.0             |             |                                                              |                          |
| VYIHLQYL     | 10     | Kb               | 39                               | 1.0             |             |                                                              |                          |
| VYIHLQYLL    | 11     | Kb               | 69                               | 1.0             |             |                                                              |                          |
| IYIHLQYL     | 9      | Kd               | 105                              | 1.0             |             |                                                              |                          |
| IYIHLQYLL    | 10     | Kd               | 575                              | 1.0             |             |                                                              |                          |
| IHLQYLL      | 8      | Kb               | 402                              | 1.0             |             |                                                              |                          |
| IHLQYLLSP    | 10     | Kb               | 878                              | 1.0             |             |                                                              |                          |
| IHLQYLLSPI   | 11     | Kb               | 405                              | 1.0             |             |                                                              | L                        |
| IHLQYLLSP    | 9      | Kb               | 291                              | 1.0             |             |                                                              |                          |
| IHLQYLLSPI   | 10     | Kb               | 135                              | 1.0             |             |                                                              |                          |
| IHLQYLLSPIV  | 11     | Kb               | 801                              | 1.0             |             |                                                              |                          |
| LQYLLSPI     | 8      | Kb               | 716                              | 1.0             |             |                                                              |                          |
| LQYLLSPIV    | 9      | Kb               | 599                              | 1.0             |             |                                                              |                          |
| QYLLSPIV     | 8      | Kd               | 823                              | 1.0             |             |                                                              |                          |
| LSPVHTSI     | 9      | Kb               | 712                              | 1.0             |             |                                                              |                          |
| NSISTVLYFI   | 10     | Db               | 156                              | 1.0             | 89256223    | Sodium-dicarboxylate symporter family protein                |                          |
| NSISTVLYFIL  | 11     | Db               | 717                              | 1.0             |             |                                                              |                          |
| ISTVLYFIL    | 9      | Kb               | 561                              | 1.0             |             |                                                              | L                        |
| STVLYFIL     | 8      | Kb               | 164                              | 1.0             |             |                                                              |                          |
| TVLYFILTCTYI | 11     | Kb               | 172                              | 1.0             |             |                                                              |                          |
| VLYFILTCTYI  | 10     | Kb               | 309                              | 1.0             |             |                                                              |                          |
| LYFILTCTYI   | 9      | Kd               | 76                               | 1.0             |             |                                                              |                          |
| LYFILTCTYIAL | 11     | Kb               | 89                               | 1.0             |             |                                                              | L                        |
| YFILTCTYI    | 8      | Kd               | 327                              | 1.0             |             |                                                              |                          |
| FILTCTYIAL   | 9      | Kb               | 440                              | 1.0             |             |                                                              |                          |
| ILTCTYIAL    | 8      | Kb               | 249                              | 1.0             |             |                                                              | L                        |
| TCYALIVL     | 10     | Kb               | 111                              | 1.0             |             |                                                              |                          |
| TCYALIVLI    | 11     | Kb               | 783                              | 1.0             |             |                                                              |                          |
| CYALIV       | 8      | Kd               | 759                              | 1.0             |             |                                                              |                          |
| CYALIVL      | 9      | Kd               | 260                              | 1.0             |             |                                                              |                          |
| CYALIVLI     | 10     | Kd               | 182                              | 1.0             |             |                                                              |                          |
| IALIVLIM     | 9      | Kb               | 416                              | 1.0             |             |                                                              |                          |
| LIIVLIMHITL  | 11     | Kb               | 422                              | 1.0             |             |                                                              |                          |
| IIVLIMHITL   | 10     | Kb               | 220                              | 1.0             |             |                                                              |                          |
| IIVLIMHITLL  | 11     | Kb               | 451                              | 1.0             |             |                                                              |                          |
| IIVLIMHITL   | 9      | Kb               | 40                               | 1.0             |             |                                                              |                          |
| IIVLIMHITLL  | 10     | Kb               | 80                               | 1.0             |             |                                                              |                          |
| VLIMHITLL    | 9      | Kb               | 357                              | 1.0             |             |                                                              |                          |
| VLIMHITLLVL  | 11     | Kb               | 764                              | 1.0             |             |                                                              |                          |
| IMHITLLVL    | 9      | Db               | 136                              | 1.0             |             |                                                              |                          |
| ISMTVYVL     | 8      | Kb               | 32                               | 1.0             | 89256227    | hypothetical protein                                         | L                        |
| ISMTVYVLVL   | 10     | Db               | 162                              | 1.0             |             |                                                              | L                        |
| SMTVYVLV     | 8      | Kb               | 342                              | 1.0             |             |                                                              |                          |
| SMTVYVLVL    | 9      | Db               | 359                              | 1.0             |             |                                                              |                          |
| MTVYVLV      | 8      | Kb               | 372                              | 1.0             |             |                                                              |                          |
| MTVYVLVLSNM  | 10     | Kb               | 312                              | 1.0             |             |                                                              |                          |
| TVYVLVLSNM   | 9      | Kb               | 44                               | 1.0             |             |                                                              |                          |
| TVYVLVLSNMHI | 11     | Kb               | 337                              | 1.0             |             |                                                              |                          |
| VYVLVLSNM    | 8      | Kb               | 74                               | 1.0             |             |                                                              |                          |
| VYVLVLSNMHI  | 10     | Kd               | 200                              | 1.0             |             |                                                              |                          |
| YVLVLSNMHI   | 9      | Kd               | 29                               | 1.0             |             |                                                              |                          |
| YVLVLSNMHI   | 8      | Db               | 181                              | 1.0             |             |                                                              |                          |
| LNMHKFNFIMM  | 11     | Kb               | 568                              | 1.0             |             |                                                              | L                        |
| NMHKFNFIMM   | 10     | Db               | 460                              | 1.0             |             |                                                              |                          |
| MHKFNFIMM    | 9      | Kb               | 448                              | 1.0             |             |                                                              |                          |
| ISFYGVLL     | 8      | Kb               | 391                              | 1.0             | 89256270    | hypothetical membrane protein                                | L                        |
| ISFYGVLLI    | 9      | Kb               | 371                              | 1.0             |             |                                                              |                          |
| FYGVLLIFFI   | 10     | Kd               | 295                              | 1.0             |             |                                                              | L                        |
| YGVLLIFFI    | 9      | Db               | 345                              | 1.0             |             |                                                              |                          |
| VLLIFFIFAFI  | 11     | Kb               | 824                              | 1.0             |             |                                                              |                          |
| LIIFFIFAFIL  | 11     | Kb               | 385                              | 1.0             |             |                                                              |                          |
| LIIFFIFAFI   | 9      | Kb               | 603                              | 1.0             |             |                                                              |                          |
| LIIFFIFAFIL  | 10     | Kb               | 155                              | 1.0             |             |                                                              |                          |
| IFFIFAFI     | 8      | Kb               | 532                              | 1.0             |             |                                                              |                          |
| IFFIFAFIL    | 9      | Kb               | 284                              | 1.0             |             |                                                              |                          |
| FIFAFILF     | 8      | Kb               | 633                              | 1.0             |             |                                                              |                          |
| FIFAFILFYLL  | 10     | Kb               | 192                              | 1.0             |             |                                                              |                          |
| FIFAFILFYLL  | 11     | Kb               | 219                              | 1.0             |             |                                                              |                          |
| FAFILFYLL    | 8      | Db               | 209                              | 1.0             |             |                                                              |                          |
| FAFILFYLL    | 9      | Kb               | 93                               | 1.0             |             |                                                              |                          |
| FAFILFYLLV   | 10     | Kb               | 775                              | 1.0             |             |                                                              |                          |
| AFILFYLL     | 8      | Kb               | 459                              | 1.0             |             |                                                              |                          |
| AFILFYLLVNL  | 11     | Kb               | 339                              | 1.0             |             |                                                              |                          |
| FILFYLLV     | 8      | Kb               | 620                              | 1.0             |             |                                                              |                          |
| FILFYLLVNL   | 10     | Kb               | 259                              | 1.0             |             |                                                              |                          |
| ILFYLLVNL    | 9      | Kb               | 63                               | 1.0             |             |                                                              | L                        |
| LFYLLVNL     | 8      | Kb               | 189                              | 1.0             |             |                                                              |                          |
| FYLLVNLNV    | 9      | Kd               | 307                              | 1.0             |             |                                                              |                          |
| FYLLVNLNVF   | 10     | Kd               | 819                              | 1.0             |             |                                                              |                          |
| YLLVNLNVF    | 9      | Db               | 376                              | 1.0             |             |                                                              |                          |
| LLVNLNVFSSL  | 11     | Kb               | 721                              | 1.0             |             |                                                              | M                        |
| LVNLNVFSSL   | 10     | Kb               | 675                              | 1.0             |             |                                                              | L                        |
| VNLNVFSSL    | 9      | Kb               | 57                               | 1.0             |             |                                                              |                          |
| VNLNVFSSLNL  | 11     | Kb               | 424                              | 1.0             |             |                                                              |                          |
| NVFSSLNLVIL  | 11     | Kb               | 591                              | 1.0             |             |                                                              |                          |
| FSSLNLVI     | 8      | Db               | 120                              | 1.0             |             |                                                              |                          |
| FSSLNLVIL    | 9      | Db               | 16                               | 1.0             |             |                                                              |                          |
| FSSLNLVILPL  | 11     | Db               | 96                               | 1.0             |             |                                                              | L                        |
| SSLNLVIL     | 8      | Kb               | 349                              | 1.0             |             |                                                              |                          |
| SSLNLVILPL   | 10     | Kb               | 57                               | 1.0             |             |                                                              |                          |
| FALLIIFI     | 8      | Db               | 25                               | 1.0             | 89256312    | Proton-dependent oligopeptide transport (POT) family protein |                          |
| FALLIIFITV   | 10     | Db               | 246                              | 1.0             |             |                                                              |                          |
| FALLIIFITVL  | 11     | Db               | 55                               | 1.0             |             |                                                              |                          |
| ALLIIFITVL   | 10     | Kb               | 370                              | 1.0             |             |                                                              |                          |

| Sequence    | Length | Predicted allele | Affinity (IC <sub>50</sub> , nM) | Cluster density | Protein gi# | Protein annotation            | Responder <sup>(a)</sup> |
|-------------|--------|------------------|----------------------------------|-----------------|-------------|-------------------------------|--------------------------|
| ALLIFITVLL  | 11     | Kb               | 470                              | 1.0             |             |                               |                          |
| LLIFITVL    | 9      | Kb               | 321                              | 1.0             |             |                               |                          |
| LLIFITVLL   | 10     | Kb               | 399                              | 1.0             |             |                               |                          |
| LLIFITVLLL  | 11     | Kb               | 826                              | 1.0             |             |                               |                          |
| LIIFITVLL   | 9      | Kb               | 305                              | 1.0             |             |                               |                          |
| LIIFITVLLL  | 10     | Kb               | 698                              | 1.0             |             |                               |                          |
| IIFITVLL    | 8      | Kb               | 166                              | 1.0             |             |                               |                          |
| IIFITVLLL   | 9      | Kb               | 241                              | 1.0             |             |                               |                          |
| IFITVLLL    | 8      | Kb               | 680                              | 1.0             |             |                               |                          |
| ITVLLFI     | 8      | Db               | 912                              | 1.0             |             |                               |                          |
| ITVLLFIAL   | 10     | Kb               | 65                               | 1.0             |             |                               |                          |
| TVLLFIAL    | 9      | Kb               | 24                               | 1.0             |             |                               |                          |
| VLLFIAL     | 8      | Kb               | 199                              | 1.0             |             |                               |                          |
| LLFIALQYPL  | 11     | Kb               | 411                              | 1.0             |             |                               |                          |
| LLFIALQYPL  | 10     | Kb               | 238                              | 1.0             |             |                               |                          |
| LFIALQYPL   | 9      | Kd               | 592                              | 1.0             |             |                               | M                        |
| LSMIAMTLL   | 9      | Kb               | 440                              | 1.0             | 89256315    | hypothetical membrane protein |                          |
| LSMIAMTLLTM | 11     | Kb               | 336                              | 1.0             |             |                               | H                        |
| SMIAMTLL    | 8      | Db               | 487                              | 1.0             |             |                               |                          |
| SMIAMTLLTM  | 10     | Db               | 60                               | 1.0             |             |                               |                          |
| IAMTLLTM    | 8      | Db               | 93                               | 1.0             |             |                               | H                        |
| IAMTLLTMFL  | 10     | Db               | 189                              | 1.0             |             |                               |                          |
| MTLTLMFL    | 8      | Kb               | 794                              | 1.0             |             |                               |                          |
| MTLTMFLQYI  | 11     | Kb               | 836                              | 1.0             |             |                               |                          |
| LTMFLQYIGI  | 10     | Kb               | 745                              | 1.0             |             |                               |                          |
| TMFLQYIGI   | 9      | Kb               | 75                               | 1.0             |             |                               | L                        |
| TMFLQYIGIFL | 11     | Kb               | 65                               | 1.0             |             |                               |                          |
| LQYIGIFLAI  | 10     | Kb               | 457                              | 1.0             |             |                               |                          |
| LQYIGIFLAIL | 11     | Kb               | 56                               | 1.0             |             |                               |                          |
| QYIGIFLAI   | 9      | Kd               | 18                               | 1.0             |             |                               |                          |
| QYIGIFLAIL  | 10     | Kd               | 59                               | 1.0             |             |                               |                          |
| QYIGIFLAILL | 11     | Kd               | 116                              | 1.0             |             |                               |                          |
| IGIFLAIL    | 8      | Kb               | 142                              | 1.0             |             |                               |                          |
| IGIFLAILL   | 9      | Kb               | 76                               | 1.0             |             |                               |                          |
| VGSIIAAI    | 9      | Kb               | 461                              | 1.1             | 89256352    | hypothetical protein          |                          |
| ISIIAIFSYL  | 11     | Kb               | 76                               | 1.1             |             |                               | L                        |
| SIIAAIFSYL  | 10     | Kb               | 283                              | 1.1             |             |                               | L                        |
| IAAIFSYL    | 9      | Kb               | 329                              | 1.1             |             |                               |                          |
| IAAIFSYL    | 8      | Kb               | 224                              | 1.1             |             |                               |                          |
| IAAIFSYLAAL | 11     | Kb               | 63                               | 1.1             |             |                               |                          |
| AAIFSYLAAL  | 10     | Kb               | 42                               | 1.1             |             |                               |                          |
| AAIFSYLAALI | 11     | Kb               | 728                              | 1.1             |             |                               |                          |
| AIFSYLAAL   | 9      | Kb               | 34                               | 1.1             |             |                               |                          |
| AIFSYLAALI  | 10     | Kb               | 534                              | 1.1             |             |                               |                          |
| FSYLAALI    | 8      | Kb               | 291                              | 1.1             |             |                               |                          |
| FSYLAALIAI  | 10     | Db               | 73                               | 1.1             |             |                               |                          |
| FSYLAALIAII | 11     | Db               | 478                              | 1.1             |             |                               |                          |
| SYLAALIAI   | 9      | Kd               | 15                               | 1.1             |             |                               |                          |
| SYLAALIAII  | 10     | Kd               | 49                               | 1.1             |             |                               |                          |
| SYLAALIAIII | 11     | Kd               | 81                               | 1.1             |             |                               |                          |
| LAALIAIIIGL | 11     | Kb               | 499                              | 1.1             |             |                               |                          |
| AALIAIII    | 8      | Db               | 778                              | 1.1             |             |                               |                          |
| AALIAIIIGL  | 10     | Kb               | 137                              | 1.1             |             |                               |                          |
| ISIFLYFL    | 9      | Kb               | 45                               | 1.0             | 89256377    | hypothetical membrane protein | L                        |
| ISIFLYFLV   | 10     | Kb               | 559                              | 1.0             |             |                               |                          |
| ISIFLYFLVI  | 11     | Kb               | 337                              | 1.0             |             |                               |                          |
| SIFLYFL     | 8      | Kb               | 54                               | 1.0             |             |                               | L                        |
| SIFLYFLV    | 9      | Kb               | 843                              | 1.0             |             |                               |                          |
| SIFLYFLVI   | 10     | Kb               | 536                              | 1.0             |             |                               |                          |
| SIFLYFLVIV  | 11     | Kb               | 703                              | 1.0             |             |                               |                          |
| IFLYFLVIVM  | 11     | Kb               | 241                              | 1.0             |             |                               |                          |
| FLYFLVIVM   | 10     | Kb               | 133                              | 1.0             |             |                               |                          |
| FLYFLVIVMI  | 11     | Kb               | 650                              | 1.0             |             |                               |                          |
| LYFLVIVM    | 9      | Kb               | 354                              | 1.0             |             |                               |                          |
| LYFLVIVMI   | 10     | Kd               | 383                              | 1.0             |             |                               |                          |
| LVIVMIYFTSL | 11     | Kb               | 140                              | 1.0             |             |                               |                          |
| VIVMIYFTSL  | 10     | Kb               | 49                               | 1.0             |             |                               |                          |
| IVMIYFTSL   | 9      | Kb               | 17                               | 1.0             |             |                               |                          |
| VMIYFTSL    | 8      | Kb               | 33                               | 1.0             |             |                               |                          |
| MIYFTSLSNQI | 11     | Kb               | 412                              | 1.0             |             |                               |                          |
| IYFTSLSNQI  | 10     | Kd               | 8                                | 1.0             |             |                               |                          |
| IYFTSLSNQIL | 11     | Kd               | 41                               | 1.0             |             |                               |                          |
| YFTSLSNQI   | 9      | Kd               | 759                              | 1.0             |             |                               |                          |
| TSLSNQIL    | 8      | Db               | 195                              | 1.0             |             |                               |                          |
| TSLSNQILL   | 9      | Db               | 10                               | 1.0             |             |                               |                          |
| LSYGVFVAFI  | 11     | Kb               | 156                              | 1.0             | 89256404    | amino acid permease           |                          |
| SYGVFVAF    | 9      | Kd               | 758                              | 1.0             |             |                               |                          |
| SYGVFVAFI   | 10     | Kd               | 79                               | 1.0             |             |                               |                          |
| SYGVFVAFII  | 11     | Kd               | 137                              | 1.0             |             |                               |                          |
| YGVFVAFIIML | 11     | Kb               | 671                              | 1.0             |             |                               |                          |
| GVFVAFIIML  | 10     | Kb               | 478                              | 1.0             |             |                               |                          |
| VFVAFIIML   | 9      | Kb               | 280                              | 1.0             |             |                               |                          |
| VFVAFIIMLSL | 11     | Kb               | 471                              | 1.0             |             |                               |                          |
| VAFIIMLSL   | 9      | Kb               | 46                               | 1.0             |             |                               |                          |
| AFIIMLSLTYL | 11     | Kd               | 67                               | 1.0             |             |                               |                          |
| FIIMLSLTYL  | 10     | Db               | 212                              | 1.0             |             |                               |                          |
| IIMLSLTYL   | 9      | Db               | 105                              | 1.0             |             |                               | L                        |
| IMLSLTYL    | 8      | Db               | 126                              | 1.0             |             |                               |                          |
| LSLTYLNT    | 8      | Kb               | 159                              | 1.0             |             |                               |                          |
| LSLTYLNTYKL | 11     | Kb               | 124                              | 1.0             |             |                               | L                        |
| LTYLNTYKL   | 9      | Kb               | 43                               | 1.0             |             |                               |                          |
| TYLNTYKL    | 8      | Kd               | 512                              | 1.0             |             |                               |                          |
| IAISFLYF    | 8      | Kb               | 712                              | 1.0             | 89256517    | hypothetical protein          |                          |
| IAISFLYFM   | 9      | Db               | 60                               | 1.0             |             |                               |                          |
| IAISFLYFMP  | 10     | Kb               | 402                              | 1.0             |             |                               |                          |
| IAISFLYFMPI | 11     | Kb               | 106                              | 1.0             |             |                               |                          |
| ISFLYFMP    | 8      | Kb               | 713                              | 1.0             |             |                               |                          |

| Sequence    | Length | Predicted allele | Affinity (IC <sub>50</sub> , nM) | Cluster density | Protein gi# | Protein annotation                                    | Responder <sup>(a)</sup> |
|-------------|--------|------------------|----------------------------------|-----------------|-------------|-------------------------------------------------------|--------------------------|
| ISFLYFMPI   | 9      | Kb               | 23                               | 1.0             |             |                                                       |                          |
| ISFLYFMPII  | 10     | Kb               | 55                               | 1.0             |             |                                                       | L                        |
| SFLYFMPII   | 9      | Kb               | 692                              | 1.0             |             |                                                       | L                        |
| SFLYFMPIISL | 11     | Kb               | 59                               | 1.0             |             |                                                       | L                        |
| FLYFMPIISL  | 10     | Kb               | 60                               | 1.0             |             |                                                       | L                        |
| LYFMPIISL   | 9      | Kb               | 81                               | 1.0             |             |                                                       | M                        |
| LYFMPIISLFL | 11     | Kb               | 701                              | 1.0             |             |                                                       |                          |
| YFMPIISL    | 8      | Kd               | 770                              | 1.0             |             |                                                       |                          |
| FMPIISLFL   | 9      | Db               | 216                              | 1.0             |             |                                                       |                          |
| ISFLGWIFL   | 10     | Kb               | 168                              | 1.0             |             |                                                       |                          |
| SLFLGWIFL   | 9      | Kb               | 615                              | 1.0             |             |                                                       | L                        |
| PSVQAYYWL   | 9      | Kb               | 749                              | 1.0             | 89256552    | amino acid antiporter                                 | L                        |
| PSVQAYYWLL  | 10     | Kb               | 728                              | 1.0             |             |                                                       | L                        |
| SVQAYYWL    | 8      | Kb               | 82                               | 1.1             |             |                                                       |                          |
| SVQAYYWLL   | 9      | Kb               | 843                              | 1.1             |             |                                                       | L                        |
| VQAYYLLTAL  | 11     | Kb               | 89                               | 1.1             |             |                                                       |                          |
| QAYYLLTAL   | 10     | Kb               | 24                               | 1.1             |             |                                                       |                          |
| AYYLLTAL    | 9      | Kd               | 19                               | 1.1             |             |                                                       |                          |
| YYLLTAL     | 8      | Kd               | 13                               | 1.1             |             |                                                       |                          |
| YWLLTALSTQI | 11     | Kd               | 488                              | 1.1             |             |                                                       |                          |
| WLLTALSTQI  | 10     | Kd               | 878                              | 1.1             |             |                                                       |                          |
| LTALSTQIYSL | 11     | Kb               | 515                              | 1.1             |             |                                                       |                          |
| TALSTQIYSL  | 10     | Kb               | 51                               | 1.1             |             |                                                       |                          |
| TALSTQIYSLM | 11     | Kb               | 74                               | 1.1             |             |                                                       |                          |
| LSTQIYSLM   | 9      | Kb               | 168                              | 1.1             |             |                                                       |                          |
| LSTQIYSLMYL | 11     | Kb               | 170                              | 1.1             |             |                                                       |                          |
| STQIYSLM    | 8      | Kb               | 125                              | 1.1             |             |                                                       |                          |
| STQIYSLMYL  | 10     | Kb               | 716                              | 1.1             |             |                                                       |                          |
| TQIYSLMYL   | 9      | Kb               | 111                              | 1.1             |             |                                                       |                          |
| TQIYSLMYLM  | 10     | Kb               | 297                              | 1.1             |             |                                                       |                          |
| TQIYSLMYLMM | 11     | Kb               | 133                              | 1.1             |             |                                                       |                          |
| QIYSLMYL    | 8      | Kb               | 270                              | 1.1             |             |                                                       |                          |
| QIYSLMYLM   | 9      | Kb               | 530                              | 1.1             |             |                                                       | H                        |
| QIYSLMYLMM  | 10     | Kb               | 240                              | 1.1             |             |                                                       | M                        |
| IYSLMYLMM   | 9      | Kb               | 784                              | 1.1             |             |                                                       |                          |
| YSLMYLMM    | 8      | Db               | 58                               | 1.1             |             |                                                       |                          |
| YSLMYLMMFFA | 11     | Db               | 722                              | 1.1             |             |                                                       |                          |
| LMYLMFFAA   | 10     | Kb               | 602                              | 1.1             |             |                                                       |                          |
| LMYLMFFAAL  | 11     | Kb               | 11                               | 1.1             |             |                                                       | L                        |
| MYLMFFAAL   | 10     | Kd               | 35                               | 1.1             |             |                                                       |                          |
| YLMFFAAL    | 9      | Kb               | 120                              | 1.1             |             |                                                       |                          |
| YLMFFAALKL  | 11     | Kb               | 978                              | 1.1             |             |                                                       |                          |
| LMMFFAAL    | 8      | Kb               | 108                              | 1.2             |             |                                                       |                          |
| LMMFFAALKL  | 10     | Kb               | 206                              | 1.2             |             |                                                       |                          |
| MMFFAALKL   | 9      | Kb               | 321                              | 1.2             |             |                                                       |                          |
| MMFFAALKLKL | 11     | Kb               | 318                              | 1.2             |             |                                                       |                          |
| FIITILYFI   | 9      | Db               | 119                              | 1.0             | 89256614    | virulence factor MvIN                                 |                          |
| FIITILYFIAL | 11     | Db               | 780                              | 1.0             |             |                                                       |                          |
| IITILYFIAL  | 10     | Kb               | 158                              | 1.0             |             |                                                       |                          |
| ITILYFIAL   | 9      | Kb               | 13                               | 1.0             |             |                                                       |                          |
| ITILYFIALFL | 11     | Kb               | 149                              | 1.0             |             |                                                       |                          |
| TILYFIAL    | 8      | Kb               | 191                              | 1.0             |             |                                                       | L                        |
| TILYFIALFL  | 10     | Kb               | 130                              | 1.0             |             |                                                       |                          |
| TILYFIALFLL | 11     | Kb               | 72                               | 1.0             |             |                                                       |                          |
| ILYFIALFL   | 9      | Kb               | 273                              | 1.0             |             |                                                       |                          |
| ILYFIALFLL  | 10     | Kb               | 142                              | 1.0             |             |                                                       |                          |
| ILYFIALFLLI | 11     | Kb               | 759                              | 1.0             |             |                                                       |                          |
| LYFIALFLL   | 9      | Kb               | 616                              | 1.0             |             |                                                       |                          |
| IALFLLI     | 8      | Db               | 848                              | 1.0             |             |                                                       |                          |
| IALFLLIITFL | 11     | Kb               | 53                               | 1.0             |             |                                                       |                          |
| ALFLLIITFL  | 10     | Kb               | 307                              | 1.0             |             |                                                       |                          |
| LFLLIITFL   | 9      | Kd               | 182                              | 1.0             |             |                                                       |                          |
| LIITFLAI    | 8      | Kb               | 668                              | 1.0             |             |                                                       |                          |
| IALSAYANI   | 9      | Kb               | 223                              | 1.0             | 89256710    | major facilitator superfamily (MFS) transport protein |                          |
| IALSAYANIM  | 10     | Kb               | 51                               | 1.0             |             |                                                       |                          |
| LSAYANIMY   | 9      | Dd               | 670                              | 1.0             |             |                                                       |                          |
| LSAYANIMYYL | 11     | Kb               | 403                              | 1.0             |             |                                                       |                          |
| SAYANIMYYL  | 10     | Kb               | 21                               | 1.0             |             |                                                       | L                        |
| SAYANIMYYLV | 11     | Db               | 107                              | 1.0             |             |                                                       |                          |
| AYANIMYYL   | 9      | Kd               | 693                              | 1.0             |             |                                                       |                          |
| YANIMYYL    | 8      | Db               | 56                               | 1.0             |             |                                                       |                          |
| YANIMYYLV   | 9      | Db               | 633                              | 1.0             |             |                                                       |                          |
| YANIMYYLVL  | 10     | Db               | 73                               | 1.0             |             |                                                       |                          |
| ANIMYYLV    | 8      | Kb               | 38                               | 1.0             |             |                                                       |                          |
| ANIMYYLVL   | 9      | Kb               | 150                              | 1.0             |             |                                                       |                          |
| NIMYYLVLSYL | 11     | Kb               | 417                              | 1.0             |             |                                                       |                          |
| IMYYLVLSYL  | 10     | Kb               | 10                               | 1.0             |             |                                                       |                          |
| MYYLVLSYL   | 9      | Kd               | 27                               | 1.0             |             |                                                       |                          |
| YYLVLSYL    | 8      | Kd               | 25                               | 1.0             |             |                                                       |                          |
| LSYLSNHFVEL | 11     | Kb               | 35                               | 1.0             |             |                                                       |                          |
| SYLSNHFV    | 8      | Kd               | 46                               | 1.0             |             |                                                       |                          |
| SYLSNHFVEL  | 10     | Kd               | 43                               | 1.0             |             |                                                       |                          |
| LIFAYPSF    | 8      | Kb               | 76                               | 1.0             |             |                                                       |                          |
| LIFAYPSFM   | 9      | Kb               | 269                              | 1.0             |             |                                                       |                          |
| LIFAYPSFML  | 10     | Kb               | 269                              | 1.0             |             |                                                       |                          |
| LIFAYPSFMLM | 11     | Kb               | 208                              | 1.0             |             |                                                       |                          |
| FAYPSFML    | 8      | Db               | 931                              | 1.0             |             |                                                       |                          |
| FAYPSFMLM   | 9      | Kb               | 150                              | 1.0             |             |                                                       |                          |
| FAYPSFMLMNM | 11     | Kb               | 139                              | 1.0             |             |                                                       |                          |
| AYPSFMLMNM  | 10     | Kb               | 514                              | 1.0             |             |                                                       |                          |
| FMLMNMGV    | 8      | Db               | 335                              | 1.0             |             |                                                       |                          |
| FMLMNMGVV   | 9      | Db               | 6                                | 1.0             |             |                                                       |                          |
| FMLMNMGVVY  | 10     | Db               | 680                              | 1.0             |             |                                                       |                          |
| FMLMNMGVVYL | 11     | Db               | 6                                | 1.0             |             |                                                       |                          |
| MGVVYLV     | 8      | Kb               | 112                              | 1.0             |             |                                                       | L                        |
| MGVVYLVLAM  | 10     | Kb               | 565                              | 1.0             |             |                                                       |                          |
| VVYLVLAM    | 8      | Kb               | 255                              | 1.0             |             |                                                       |                          |



| Sequence    | Length | Predicted allele | Affinity (IC <sub>50</sub> , nM) | Cluster density | Protein gi# | Protein annotation                                                  | Responder <sup>(a)</sup> |
|-------------|--------|------------------|----------------------------------|-----------------|-------------|---------------------------------------------------------------------|--------------------------|
| VVYVLAMI    | 9      | Kb               | 244                              | 1.0             |             |                                                                     |                          |
| VVYVLAMII   | 10     | Kb               | 500                              | 1.0             |             |                                                                     |                          |
| VVYVLAMIII  | 11     | Kb               | 53                               | 1.0             |             |                                                                     |                          |
| VYVLAMI     | 8      | Kd               | 361                              | 1.0             |             |                                                                     |                          |
| YVLAMIII    | 9      | Db               | 618                              | 1.0             |             |                                                                     |                          |
| VLAMIILSVPL | 11     | Kb               | 613                              | 1.0             |             |                                                                     |                          |
| LAMIILSVPL  | 10     | Kb               | 118                              | 1.0             |             |                                                                     |                          |
| LAMIILSVPLM | 11     | Kb               | 263                              | 1.0             |             |                                                                     |                          |
| AMIILSVPL   | 9      | Kb               | 97                               | 1.0             |             |                                                                     |                          |
| AMIILSVPLM  | 10     | Kb               | 236                              | 1.0             |             |                                                                     |                          |
| MIILSVPL    | 8      | Kb               | 367                              | 1.0             |             |                                                                     | L                        |
| MIILSVPLM   | 9      | Kb               | 686                              | 1.0             |             |                                                                     |                          |
| IILSVPLM    | 8      | Kb               | 433                              | 1.0             |             |                                                                     |                          |
| MEFSVTYFIML | 11     | Kb               | 421                              | 1.1             | 89256727    | DoxD-like family protein                                            |                          |
| FSVTYFIM    | 8      | Db               | 26                               | 1.1             |             |                                                                     |                          |
| FSVTYFIML   | 9      | Db               | 47                               | 1.1             |             |                                                                     |                          |
| SVTYFIML    | 8      | Kb               | 782                              | 1.1             |             |                                                                     |                          |
| SVTYFIMLFTL | 11     | Kb               | 144                              | 1.1             |             |                                                                     |                          |
| VTYFIMLFTL  | 10     | Kb               | 21                               | 1.1             |             |                                                                     |                          |
| TYFIMLFTL   | 9      | Kd               | 61                               | 1.1             |             |                                                                     |                          |
| TYFIMLFTLF  | 10     | Kd               | 977                              | 1.1             |             |                                                                     |                          |
| TYFIMLFTLFL | 11     | Kb               | 258                              | 1.1             |             |                                                                     |                          |
| YFIMLFTL    | 8      | Kd               | 461                              | 1.1             |             |                                                                     |                          |
| FIMLFTLFL   | 9      | Db               | 643                              | 1.1             |             |                                                                     |                          |
| IMLFTLFL    | 8      | Db               | 133                              | 1.1             |             |                                                                     |                          |
| ASLTIAL     | 8      | Kb               | 539                              | 1.0             | 89256785    | cysteine/glutathione ABC transporter membrane/ATP-binding component |                          |
| TIILFSFFSL  | 11     | Kb               | 256                              | 1.0             |             |                                                                     |                          |
| IILFSFF     | 8      | Kb               | 687                              | 1.0             |             |                                                                     | L                        |
| IILFSFFSL   | 10     | Kb               | 26                               | 1.0             |             |                                                                     |                          |
| AILFSFFSL   | 9      | Kb               | 73                               | 1.0             |             |                                                                     |                          |
| AILFSFFSLSL | 11     | Kb               | 96                               | 1.0             |             |                                                                     | L                        |
| ILFSFFSL    | 8      | Kb               | 84                               | 1.0             |             |                                                                     | L                        |
| ILFSFFSLSL  | 10     | Kb               | 39                               | 1.0             |             |                                                                     | L                        |
| FSFFSLSL    | 8      | Kb               | 790                              | 1.0             |             |                                                                     |                          |
| FSFFSLSLAL  | 10     | Kb               | 128                              | 1.0             |             |                                                                     |                          |
| FSFFSLSLALL | 11     | Kb               | 113                              | 1.0             |             |                                                                     |                          |
| SFFSLSLAL   | 9      | Kb               | 667                              | 1.0             |             |                                                                     |                          |
| SFFSLSLALL  | 10     | Kb               | 619                              | 1.0             |             |                                                                     | L                        |
| FSLSLALL    | 8      | Kb               | 138                              | 1.0             |             |                                                                     |                          |
| FSLSLALLTFI | 11     | Db               | 56                               | 1.0             |             |                                                                     |                          |
| LSLALLTFI   | 9      | Db               | 393                              | 1.0             |             |                                                                     |                          |
| LSLALLTFIAL | 11     | Kb               | 41                               | 1.0             |             |                                                                     |                          |
| SLALLTFIAL  | 10     | Kb               | 658                              | 1.0             |             |                                                                     | L                        |
| LALLTFIAL   | 9      | Kb               | 21                               | 1.0             |             |                                                                     |                          |
| LALLTFIALL  | 10     | Kb               | 42                               | 1.0             |             |                                                                     |                          |
| LALLTFIALLL | 11     | Kb               | 136                              | 1.0             |             |                                                                     |                          |
| ALLTFIAL    | 8      | Kb               | 419                              | 1.0             |             |                                                                     |                          |
| ALLTFIALL   | 9      | Kb               | 304                              | 1.0             |             |                                                                     |                          |
| ALLTFIALLL  | 10     | Kb               | 987                              | 1.0             |             |                                                                     |                          |
| IALLLIGFVI  | 10     | Db               | 643                              | 1.0             |             |                                                                     |                          |
| IALLLIGFVIP | 11     | Kb               | 920                              | 1.0             |             |                                                                     |                          |
| ALLLIGFVIPL | 11     | Kb               | 432                              | 1.0             |             |                                                                     |                          |
| LLLIGFVIPL  | 10     | Kb               | 215                              | 1.2             |             |                                                                     |                          |
| LLIGFVIPL   | 9      | Kb               | 297                              | 1.2             |             |                                                                     |                          |
| LSSYLQYIL   | 10     | Kb               | 812                              | 1.1             | 89256788    | sulfate permease family protein                                     |                          |
| LSSYLQYILL  | 11     | Kb               | 196                              | 1.1             |             |                                                                     |                          |
| SSYLQVI     | 8      | Kb               | 217                              | 1.1             |             |                                                                     |                          |
| SSYLQYIL    | 9      | Kb               | 41                               | 1.1             |             |                                                                     |                          |
| SSYLQYILL   | 10     | Kb               | 16                               | 1.1             |             |                                                                     |                          |
| SYLQYIL     | 8      | Kd               | 200                              | 1.1             |             |                                                                     |                          |
| SYLQYILL    | 9      | Kb               | 131                              | 1.1             |             |                                                                     |                          |
| YLQYILL     | 8      | Kb               | 97                               | 1.1             |             |                                                                     |                          |
| LQYILLCVI   | 9      | Kb               | 388                              | 1.1             |             |                                                                     |                          |
| LQYILLCVIM  | 10     | Kb               | 91                               | 1.1             |             |                                                                     |                          |
| QYILLCVI    | 8      | Kd               | 12                               | 1.1             |             |                                                                     | L                        |
| QYILLCVIM   | 9      | Kd               | 186                              | 1.1             |             |                                                                     |                          |
| KSNSFFYIFI  | 10     | Db               | 888                              | 1.0             | 89256811    | cell division protein                                               |                          |
| NSFFYIFI    | 8      | Kb               | 551                              | 1.0             |             |                                                                     |                          |
| NSFFYIFISV  | 10     | Kb               | 287                              | 1.0             |             |                                                                     |                          |
| NSFFYIFISVV | 11     | Kb               | 913                              | 1.0             |             |                                                                     |                          |
| SFFYIFISV   | 9      | Kb               | 365                              | 1.0             |             |                                                                     |                          |
| SFFYIFISVVL | 11     | Kb               | 167                              | 1.0             |             |                                                                     | L                        |
| FFYIFISV    | 8      | Kb               | 196                              | 1.0             |             |                                                                     |                          |
| FFYIFISVVL  | 10     | Kb               | 287                              | 1.0             |             |                                                                     |                          |
| FFYIFISVVL  | 11     | Kb               | 242                              | 1.0             |             |                                                                     |                          |
| FYIFISV     | 8      | Kd               | 56                               | 1.0             |             |                                                                     | L                        |
| FYIFISVVL   | 9      | Kd               | 81                               | 1.0             |             |                                                                     |                          |
| FYIFISVVL   | 10     | Kd               | 175                              | 1.0             |             |                                                                     |                          |
| FYIFISVVL   | 11     | Kd               | 329                              | 1.0             |             |                                                                     |                          |
| YIFISVVL    | 9      | Kb               | 818                              | 1.0             |             |                                                                     | L                        |
| IFISVVL     | 8      | Kb               | 479                              | 1.0             |             |                                                                     | L                        |
| ISVLLLIAI   | 10     | Db               | 345                              | 1.0             |             |                                                                     |                          |
| ISVLLLIAIL  | 11     | Kb               | 334                              | 1.0             |             |                                                                     |                          |
| SVVLLLIAI   | 9      | Db               | 870                              | 1.0             |             |                                                                     |                          |
| SVVLLLIAIL  | 10     | Kb               | 266                              | 1.0             |             |                                                                     |                          |
| VVLLLIAIL   | 9      | Kb               | 84                               | 1.0             |             |                                                                     |                          |
| IAILQYNL    | 8      | Kb               | 245                              | 1.0             |             |                                                                     |                          |
| MIFHPII     | 8      | Kb               | 364                              | 1.1             | 89256851    | hypothetical protein                                                |                          |
| IIPILFSYSM  | 10     | Kb               | 61                               | 1.1             |             |                                                                     |                          |
| IIPILFSYSMI | 11     | Kb               | 610                              | 1.1             |             |                                                                     |                          |
| IPIILFSYSM  | 9      | Kb               | 175                              | 1.1             |             |                                                                     | M                        |
| ILFSYSMI    | 8      | Kb               | 133                              | 1.1             |             |                                                                     |                          |
| ILFSYSMIIVI | 11     | Kb               | 706                              | 1.1             |             |                                                                     |                          |
| FSYSMIIV    | 8      | Kb               | 740                              | 1.1             |             |                                                                     |                          |
| FSYSMIIVI   | 9      | Db               | 63                               | 1.1             |             |                                                                     |                          |
| FSYSMIIVITI | 11     | Db               | 100                              | 1.1             |             |                                                                     |                          |
| SYSMIIVI    | 8      | Kd               | 536                              | 1.1             |             |                                                                     |                          |

| Sequence     | Length | Predicted allele | Affinity (IC <sub>50</sub> , nM) | Cluster density | Protein gi# | Protein annotation                                | Responder <sup>(a)</sup> |
|--------------|--------|------------------|----------------------------------|-----------------|-------------|---------------------------------------------------|--------------------------|
| SYSMIIVITI   | 10     | Kd               | 542                              | 1.1             |             |                                                   |                          |
| SYSMIIVITIL  | 11     | Kd               | 111                              | 1.1             |             |                                                   |                          |
| YSMIIVITI    | 9      | Db               | 109                              | 1.1             |             |                                                   |                          |
| YSMIIVITIL   | 10     | Db               | 575                              | 1.1             |             |                                                   |                          |
| SMIIVITI     | 8      | Db               | 510                              | 1.1             |             |                                                   |                          |
| SMIIVITIL    | 9      | Kb               | 435                              | 1.1             |             |                                                   |                          |
| MIIVITIL     | 8      | Kb               | 874                              | 1.1             |             |                                                   |                          |
| IVLVYIVYI    | 9      | Kb               | 381                              | 1.0             | 89256861    | PerM family protein                               |                          |
| IVLVYIVYL    | 10     | Kb               | 196                              | 1.0             |             |                                                   |                          |
| LVYIVYL      | 8      | Kb               | 199                              | 1.0             |             |                                                   |                          |
| LVYIVYILFL   | 10     | Kb               | 79                               | 1.0             |             |                                                   |                          |
| LVYIVYILFLI  | 11     | Kb               | 379                              | 1.0             |             |                                                   |                          |
| VYIVYILF     | 8      | Kb               | 449                              | 1.0             |             |                                                   |                          |
| YIVYILFLIAL  | 11     | Kb               | 413                              | 1.0             |             |                                                   |                          |
| IVYILFLIAL   | 10     | Kb               | 11                               | 1.0             |             |                                                   |                          |
| IVYILFLIALL  | 11     | Kb               | 20                               | 1.0             |             |                                                   |                          |
| VYILFLIAL    | 9      | Kb               | 38                               | 1.0             |             |                                                   |                          |
| VYILFLIALL   | 10     | Kb               | 94                               | 1.0             |             |                                                   |                          |
| YILFLIALL    | 9      | Kb               | 289                              | 1.0             |             |                                                   |                          |
| YILFLIALLSL  | 11     | Kb               | 303                              | 1.0             |             |                                                   |                          |
| ILFLIALL     | 8      | Kb               | 356                              | 1.0             |             |                                                   |                          |
| ILFLIALLSL   | 10     | Kb               | 194                              | 1.0             |             |                                                   |                          |
| IALLSLIFV    | 9      | Db               | 19                               | 1.0             |             |                                                   |                          |
| IALLSLIFVL   | 10     | Db               | 49                               | 1.0             |             |                                                   |                          |
| IALLSLIFVLL  | 11     | Kb               | 50                               | 1.0             |             |                                                   |                          |
| ALLSLIFVL    | 9      | Kb               | 962                              | 1.0             |             |                                                   |                          |
| ALLSLIFVLL   | 10     | Kb               | 484                              | 1.0             |             |                                                   |                          |
| LSLIFVLL     | 8      | Kb               | 32                               | 1.0             |             |                                                   |                          |
| LSLIFVLLPI   | 10     | Kb               | 416                              | 1.0             |             |                                                   |                          |
| LSLIFVLLPII  | 11     | Kb               | 498                              | 1.0             |             |                                                   |                          |
| SSYISVRI     | 8      | Kb               | 479                              | 1.0             | 89256892    | Phospho-N-acetylmuramoyl-pentapeptide transferase |                          |
| SSYISVRII    | 9      | Kb               | 679                              | 1.0             |             |                                                   |                          |
| SSYISVRIIM   | 10     | Kb               | 64                               | 1.0             |             |                                                   |                          |
| SSYISVRIIMI  | 11     | Kb               | 175                              | 1.0             |             |                                                   | L                        |
| SYISVRII     | 8      | Kd               | 27                               | 1.0             |             |                                                   |                          |
| SYISVRIIM    | 9      | Kd               | 39                               | 1.0             |             |                                                   | H                        |
| SYISVRIIMI   | 10     | Kd               | 22                               | 1.0             |             |                                                   |                          |
| ISVRIIMISI   | 10     | Kb               | 655                              | 1.0             |             |                                                   |                          |
| VRRIIMISITSL | 11     | Kb               | 201                              | 1.0             |             |                                                   |                          |
| RIIMISITSL   | 10     | Kb               | 800                              | 1.0             |             |                                                   | L                        |
| IIMISITSL    | 9      | Kb               | 115                              | 1.0             |             |                                                   | L                        |
| IIMISITSLL   | 10     | Kb               | 357                              | 1.0             |             |                                                   |                          |
| IMISITSL     | 8      | Kb               | 472                              | 1.0             |             |                                                   |                          |
| IMISITSLL    | 9      | Kb               | 181                              | 1.0             |             |                                                   |                          |
| ISITSLLI     | 8      | Db               | 366                              | 1.0             |             |                                                   |                          |
| ISITSLLITL   | 10     | Db               | 55                               | 1.0             |             |                                                   | M                        |
| SITSLLITL    | 9      | Kb               | 563                              | 1.0             |             |                                                   | M                        |
| ITSLLITLAL   | 10     | Kb               | 602                              | 1.0             |             |                                                   |                          |
| TSLLITLAL    | 9      | Kb               | 86                               | 1.0             |             |                                                   |                          |
| SSTTGYITI    | 9      | Db               | 168                              | 1.0             | 89256896    | hypothetical protein                              |                          |
| SSTTGYITHL   | 11     | Kb               | 886                              | 1.0             |             |                                                   |                          |
| TTGYITIL     | 9      | Kb               | 748                              | 1.0             |             |                                                   | L                        |
| TGYITIL      | 8      | Kb               | 365                              | 1.0             |             |                                                   |                          |
| TGYITILNLL   | 10     | Kb               | 52                               | 1.0             |             |                                                   |                          |
| TGYITILNLL   | 11     | Kb               | 24                               | 1.0             |             |                                                   |                          |
| GYITILNLL    | 9      | Kd               | 112                              | 1.0             |             |                                                   |                          |
| GYITILNLL    | 10     | Kd               | 31                               | 1.0             |             |                                                   |                          |
| ITILNLL      | 8      | Kb               | 474                              | 1.0             |             |                                                   |                          |
| TILNLLYA     | 9      | Db               | 371                              | 1.0             |             |                                                   |                          |
| TILNLLYAQL   | 11     | Kb               | 114                              | 1.0             |             |                                                   |                          |
| IILNLLYAQL   | 10     | Kb               | 58                               | 1.0             |             |                                                   |                          |
| ILNLLYAQL    | 9      | Kb               | 642                              | 1.0             |             |                                                   | M                        |
| LNLLYAQL     | 8      | Kb               | 5                                | 1.0             |             |                                                   | M                        |
| LNLLYAQLFNL  | 11     | Kb               | 309                              | 1.0             |             |                                                   | M                        |
| LLYAQLFNL    | 9      | Kb               | 270                              | 1.0             |             |                                                   |                          |
| LYAQLFNL     | 8      | Kd               | 360                              | 1.0             |             |                                                   |                          |
| LYAQLFNLSSL  | 11     | Kd               | 10                               | 1.0             |             |                                                   | M                        |
| YAQLFNLSSL   | 10     | Kb               | 408                              | 1.0             |             |                                                   |                          |
| AQLFNLSSL    | 9      | Kb               | 35                               | 1.0             |             |                                                   |                          |
| FNLSSLGYI    | 9      | Db               | 248                              | 1.0             |             |                                                   |                          |
| FNLSSLGYISI  | 11     | Db               | 447                              | 1.0             |             |                                                   |                          |
| LSSLGYISI    | 9      | Kb               | 768                              | 1.0             |             |                                                   |                          |
| LSSLGYISIPL  | 11     | Kb               | 206                              | 1.0             |             |                                                   |                          |
| SSLGYISI     | 8      | Kb               | 69                               | 1.0             |             |                                                   |                          |
| SSLGYISIPL   | 10     | Kb               | 52                               | 1.0             |             |                                                   |                          |
| LGYSISIPL    | 8      | Kb               | 201                              | 1.0             |             |                                                   |                          |
| LGYSISIPLAFI | 11     | Kb               | 381                              | 1.0             |             |                                                   |                          |
| GYISIPLAFI   | 10     | Kd               | 32                               | 1.0             |             |                                                   |                          |
| GYISIPLAFII  | 11     | Kd               | 55                               | 1.0             |             |                                                   |                          |
| ISIPLAFI     | 8      | Kb               | 950                              | 1.0             |             |                                                   |                          |
| ISIPLAFIIL   | 10     | Kb               | 201                              | 1.0             |             |                                                   |                          |
| ISIPLAFIILL  | 11     | Kb               | 118                              | 1.0             |             |                                                   |                          |
| SIPLAFIIL    | 9      | Kb               | 296                              | 1.0             |             |                                                   |                          |
| SIPLAFIILL   | 10     | Kb               | 159                              | 1.0             |             |                                                   |                          |
| IPLAFIIL     | 8      | Kb               | 806                              | 1.0             |             |                                                   |                          |
| IPLAFIILLVL  | 11     | Kb               | 458                              | 1.0             |             |                                                   |                          |
| KNPSRNVVP    | 8      | Dd               | 932                              | 1.0             | 89256917    | amino acid transporter protein, fragment          |                          |
| KNPSRNVPL    | 9      | Dd               | 37                               | 1.0             |             |                                                   |                          |
| KNPSRNVPLA   | 10     | Dd               | 596                              | 1.0             |             |                                                   |                          |
| KNPSRNVPLAI  | 11     | Dd               | 298                              | 1.0             |             |                                                   |                          |
| NVPLAIILSL   | 10     | Kb               | 771                              | 1.0             |             |                                                   |                          |
| VPLAIILSL    | 9      | Kb               | 441                              | 1.0             |             |                                                   |                          |
| VPLAIILSLAL  | 11     | Kb               | 855                              | 1.0             |             |                                                   |                          |
| LAIILSLAL    | 9      | Kb               | 324                              | 1.0             |             |                                                   |                          |
| LAIILSLALVL  | 11     | Kb               | 657                              | 1.0             |             |                                                   |                          |
| AIILSLALVLL  | 11     | Kb               | 617                              | 1.0             |             |                                                   |                          |
| IILSLALV     | 8      | Kb               | 414                              | 1.0             |             |                                                   |                          |

| Sequence     | Length | Predicted allele | Affinity (IC <sub>50</sub> , nM) | Cluster density | Protein gi# | Protein annotation                                    | Responder <sup>(a)</sup> |
|--------------|--------|------------------|----------------------------------|-----------------|-------------|-------------------------------------------------------|--------------------------|
| IILSLALVL    | 9      | Kb               | 562                              | 1.0             |             |                                                       |                          |
| IILSLALVLL   | 10     | Kb               | 249                              | 1.0             |             |                                                       | L                        |
| IILSLALVLLL  | 11     | Kb               | 457                              | 1.0             |             |                                                       |                          |
| LSLALVLL     | 8      | Kb               | 484                              | 1.0             |             |                                                       |                          |
| LSLALVLLL    | 9      | Kb               | 290                              | 1.0             |             |                                                       |                          |
| LSLALVLLLYM  | 11     | Kb               | 216                              | 1.0             |             |                                                       |                          |
| LALVLLLYM    | 9      | Db               | 58                               | 1.0             |             |                                                       |                          |
| LALVLLLYMGL  | 11     | Kb               | 141                              | 1.0             |             |                                                       |                          |
| ALVLLLYMGL   | 10     | Kb               | 726                              | 1.0             |             |                                                       |                          |
| LVLLLYMGL    | 9      | Kb               | 50                               | 1.0             |             |                                                       |                          |
| VLLLYMGL     | 8      | Kb               | 77                               | 1.0             |             |                                                       |                          |
| LLYMGLQYAFM  | 11     | Kb               | 129                              | 1.0             |             |                                                       |                          |
| LYMGLQYAFM   | 10     | Kd               | 631                              | 1.0             |             |                                                       |                          |
| YMGQYAFM     | 9      | Db               | 25                               | 1.0             |             |                                                       |                          |
| MGLQYAFM     | 8      | Kb               | 27                               | 1.0             |             |                                                       |                          |
| MGLQYAFMQAV  | 11     | Kb               | 513                              | 1.0             |             |                                                       |                          |
| LQYAFMQA     | 8      | Kb               | 655                              | 1.0             |             |                                                       |                          |
| LQYAFMQAV    | 9      | Kb               | 156                              | 1.0             |             |                                                       |                          |
| LQYAFMQAVP   | 10     | Kb               | 338                              | 1.0             |             |                                                       |                          |
| QYAFMQAV     | 8      | Kd               | 120                              | 1.0             |             |                                                       |                          |
| LMLTLSIVSL   | 10     | Kb               | 111                              | 1.0             | 89256946    | major facilitator superfamily (MFS) transport protein |                          |
| LTLISIVSLAM  | 10     | Kb               | 538                              | 1.0             |             |                                                       |                          |
| LTLISIVSLAML | 11     | Kb               | 279                              | 1.0             |             |                                                       |                          |
| LSIVSLAM     | 8      | Db               | 902                              | 1.0             |             |                                                       |                          |
| LSIVSLAML    | 9      | Kb               | 436                              | 1.0             |             |                                                       |                          |
| LSIVSLAMLL   | 10     | Kb               | 603                              | 1.0             |             |                                                       |                          |
| SIVSLAML     | 8      | Kb               | 171                              | 1.0             |             |                                                       |                          |
| VSLAMLLAI    | 9      | Kb               | 378                              | 1.0             |             |                                                       |                          |
| VSLAMLLAII   | 10     | Kb               | 478                              | 1.0             |             |                                                       |                          |
| VSLAMLLAIIL  | 11     | Kb               | 81                               | 1.0             |             |                                                       |                          |
| LAMLLAIL     | 9      | Kb               | 247                              | 1.0             |             |                                                       |                          |
| AMLLAIL      | 8      | Db               | 304                              | 1.0             |             |                                                       |                          |
| AMLLAILYV    | 10     | Db               | 846                              | 1.0             |             |                                                       |                          |
| MLLAILLYVPM  | 11     | Kb               | 282                              | 1.0             |             |                                                       |                          |
| LLAILLYVPM   | 10     | Kb               | 795                              | 1.0             |             |                                                       |                          |
| LAILLYVPM    | 9      | Kb               | 21                               | 1.0             |             |                                                       |                          |
| LAILLYVPMSL  | 11     | Kb               | 41                               | 1.0             |             |                                                       |                          |
| AAILLYVPM    | 8      | Kb               | 31                               | 1.0             |             |                                                       | M                        |
| AAILLYVPMSL  | 10     | Kb               | 101                              | 1.0             |             |                                                       |                          |
| IILLYVPMSL   | 9      | Kb               | 51                               | 1.0             |             |                                                       |                          |
| IILYVPMSLSM  | 11     | Kb               | 108                              | 1.0             |             |                                                       | H                        |
| ILYVPMSL     | 8      | Kb               | 129                              | 1.0             |             |                                                       |                          |
| ILYVPMSLSM   | 10     | Kb               | 295                              | 1.0             |             |                                                       |                          |
| LYVPMSLSM    | 9      | Kd               | 79                               | 1.1             |             |                                                       |                          |
| LYVPMSLSMF   | 10     | Kd               | 338                              | 1.0             |             |                                                       |                          |
| MSLSMFTVL    | 9      | Kb               | 68                               | 1.1             |             |                                                       |                          |
| LSMFTVLYFL   | 10     | Db               | 251                              | 1.1             |             |                                                       |                          |
| LSMFTVLYFLL  | 11     | Kb               | 123                              | 1.1             |             |                                                       |                          |
| SMFTVLYFLL   | 10     | Kb               | 191                              | 1.0             |             |                                                       | L                        |
| IIGIFLMFL    | 9      | Kb               | 723                              | 1.0             | 89256977    | potassium uptake protein                              |                          |
| IIGIFLMFSL   | 11     | Kb               | 217                              | 1.0             |             |                                                       |                          |
| IGIFLMFL     | 8      | Kb               | 581                              | 1.0             |             |                                                       |                          |
| IGIFLMFSL    | 10     | Kb               | 34                               | 1.0             |             |                                                       |                          |
| GIFLMFSL     | 9      | Kb               | 126                              | 1.0             |             |                                                       |                          |
| GIFLMFSLTM   | 11     | Kb               | 392                              | 1.0             |             |                                                       |                          |
| IFLMFSL      | 8      | Kb               | 398                              | 1.0             |             |                                                       | L                        |
| IFLMFSLTM    | 10     | Kb               | 243                              | 1.0             |             |                                                       |                          |
| IFLMFSLTML   | 11     | Kb               | 222                              | 1.0             |             |                                                       |                          |
| LMFSLTM      | 8      | Db               | 748                              | 1.0             |             |                                                       | H                        |
| LMFSLTML     | 9      | Kb               | 115                              | 1.0             |             |                                                       |                          |
| LMFSLTMLSP   | 11     | Kb               | 700                              | 1.0             |             |                                                       | H                        |
| MFLSML       | 8      | Kd               | 493                              | 1.0             |             |                                                       |                          |
| MFLSMLSP     | 11     | Kd               | 201                              | 1.0             |             |                                                       |                          |
| LSLTMSP      | 9      | Kb               | 58                               | 1.0             |             |                                                       | L                        |
| LSLTMSPLL    | 10     | Kb               | 130                              | 1.0             |             |                                                       |                          |
| TMLSPLLVDYI  | 11     | Db               | 178                              | 1.0             |             |                                                       |                          |
| LSPLLVDYI    | 9      | Db               | 177                              | 1.0             |             |                                                       |                          |
| LPYWLAVAI    | 9      | Kb               | 295                              | 1.0             | 89257033    | cytochrome oxidase bd-II, subunit II                  |                          |
| LAVAIILTYI   | 11     | Db               | 905                              | 1.0             |             |                                                       |                          |
| VAIILTYI     | 9      | Db               | 240                              | 1.0             |             |                                                       |                          |
| VAIILTYISM   | 11     | Kb               | 21                               | 1.0             |             |                                                       | M                        |
| AIFILTYISM   | 10     | Kb               | 43                               | 1.0             |             |                                                       |                          |
| AIFILTYISML  | 11     | Kb               | 149                              | 1.0             |             |                                                       |                          |
| IFILTYISM    | 9      | Kb               | 65                               | 1.0             |             |                                                       | M                        |
| IFILTYISML   | 10     | Kb               | 230                              | 1.0             |             |                                                       |                          |
| FILTYISM     | 8      | Kb               | 44                               | 1.0             |             |                                                       |                          |
| FILTYISML    | 9      | Kb               | 529                              | 1.0             |             |                                                       |                          |
| FILTYISMLTL  | 11     | Db               | 753                              | 1.0             |             |                                                       |                          |
| LTYSMLTL     | 9      | Kb               | 88                               | 1.0             |             |                                                       |                          |
| LTYSMLTLI    | 10     | Kb               | 532                              | 1.0             |             |                                                       |                          |
| TYISMLTL     | 8      | Kd               | 9                                | 1.0             |             |                                                       |                          |
| TYISMLTLI    | 9      | Kd               | 1                                | 1.0             |             |                                                       |                          |
| TYISMLTLIF   | 10     | Kd               | 609                              | 1.0             |             |                                                       |                          |
| ISMMLTIFPYI  | 11     | Db               | 70                               | 1.0             |             |                                                       |                          |
| SMMLTIFPYI   | 10     | Db               | 89                               | 1.0             |             |                                                       |                          |
| SMMLTIFPYII  | 11     | Db               | 118                              | 1.0             |             |                                                       |                          |
| LTIFPYI      | 8      | Kb               | 204                              | 1.0             |             |                                                       |                          |
| LIFPYIIPYQI  | 11     | Kb               | 708                              | 1.1             |             |                                                       |                          |
| AALALAIQQL   | 10     | Kb               | 126                              | 1.0             | 89257093    | hypothetical protein                                  | M                        |
| AALALAIQQLL  | 11     | Kb               | 176                              | 1.1             |             |                                                       |                          |
| LALAIQQL     | 9      | Kb               | 157                              | 1.1             |             |                                                       |                          |
| LAIQQLIYL    | 10     | Db               | 101                              | 1.1             |             |                                                       |                          |
| AIIQQLIYL    | 9      | Kb               | 82                               | 1.1             |             |                                                       |                          |
| IIQQLIYL     | 8      | Kb               | 686                              | 1.1             |             |                                                       |                          |
| IQLLIYLTNSA  | 11     | Kb               | 837                              | 1.1             |             |                                                       |                          |
| LLIYLTNSAL   | 10     | Kb               | 247                              | 1.1             |             |                                                       |                          |
| LLIYLTNSALL  | 11     | Kb               | 329                              | 1.1             |             |                                                       |                          |

| Sequence    | Length | Predicted allele | Affinity (IC <sub>50</sub> , nM) | Cluster density | Protein gi# | Protein annotation                                  | Responder <sup>(a)</sup> |
|-------------|--------|------------------|----------------------------------|-----------------|-------------|-----------------------------------------------------|--------------------------|
| LIYLTNSAL   | 9      | Kb               | 79                               | 1.1             |             |                                                     |                          |
| LIYLTNSALL  | 10     | Kb               | 124                              | 1.1             |             |                                                     |                          |
| IYLTNSAL    | 8      | Kd               | 12                               | 1.3             |             |                                                     |                          |
| IYLTNSALL   | 9      | Kd               | 327                              | 1.3             |             |                                                     |                          |
| IYLTNSALLFI | 11     | Db               | 113                              | 1.1             |             |                                                     |                          |
| TNSALLFITL  | 10     | Kb               | 868                              | 1.3             |             |                                                     |                          |
| NSALLFITL   | 9      | Kb               | 268                              | 1.3             |             |                                                     |                          |
| SALLFITL    | 8      | Kb               | 83                               | 1.3             |             |                                                     |                          |
| SALLFITLRFI | 11     | Db               | 122                              | 1.3             |             |                                                     |                          |
| LFITLRFI    | 8      | Kd               | 443                              | 1.0             |             |                                                     |                          |
| CYHKNTSNNYL | 11     | Kd               | 10                               | 1.0             |             |                                                     |                          |
| NNYLIYVYFSV | 11     | Kb               | 586                              | 1.0             |             |                                                     |                          |
| LIYVYFSV    | 8      | Kb               | 14                               | 1.0             |             |                                                     | M                        |
| LIYVYFSVI   | 9      | Kb               | 325                              | 1.0             |             |                                                     |                          |
| LIYVYFSVIFL | 11     | Kb               | 103                              | 1.0             |             |                                                     |                          |
| IYVYFSVI    | 8      | Kd               | 198                              | 1.0             |             |                                                     |                          |
| IYVYFSVIFL  | 10     | Kb               | 291                              | 1.0             |             |                                                     |                          |
| YVYFSVIFL   | 9      | Db               | 107                              | 1.0             |             |                                                     | M                        |
| YVYFSVIFLAI | 11     | Kb               | 784                              | 1.0             |             |                                                     |                          |
| VYFSVIFL    | 8      | Kb               | 265                              | 1.0             |             |                                                     |                          |
| VYFSVIFLAI  | 10     | Kd               | 290                              | 1.0             |             |                                                     |                          |
| VYFSVIFLAIL | 11     | Kb               | 214                              | 1.0             |             |                                                     |                          |
| FSVIFLAI    | 8      | Db               | 362                              | 1.0             |             |                                                     |                          |
| FSVIFLAIL   | 9      | Kb               | 194                              | 1.0             |             |                                                     |                          |
| FSVIFLAILL  | 10     | Kb               | 245                              | 1.0             |             |                                                     |                          |
| SVIFLAIL    | 8      | Kb               | 499                              | 1.0             |             |                                                     |                          |
| SVIFLAILL   | 9      | Kb               | 166                              | 1.0             |             |                                                     |                          |
| VIFLAILL    | 8      | Kb               | 301                              | 1.0             |             |                                                     |                          |
| AILLAQTAKFL | 11     | Kb               | 945                              | 1.0             |             |                                                     |                          |
| ILLAQTAKFL  | 10     | Kb               | 829                              | 1.0             |             |                                                     | L                        |
| SSMQTVFVY   | 9      | Db               | 60                               | 1.0             |             |                                                     |                          |
| TVFYVTAII   | 9      | Kb               | 595                              | 1.0             |             |                                                     |                          |
| TVFYVTAIYM  | 11     | Kb               | 64                               | 1.0             |             |                                                     |                          |
| VFYVTAII    | 8      | Kb               | 503                              | 1.0             |             |                                                     | H                        |
| VFYVTAIYM   | 10     | Kb               | 265                              | 1.0             |             |                                                     | H                        |
| FYVTAIYM    | 9      | Db               | 86                               | 1.0             |             |                                                     |                          |
| FYVTAIYMFL  | 11     | Kd               | 23                               | 1.0             |             |                                                     |                          |
| VTAIYMF     | 9      | Kb               | 427                              | 1.0             |             |                                                     |                          |
| TAIYMF      | 8      | Kb               | 187                              | 1.0             |             |                                                     |                          |
| TAIYMFVVI   | 11     | Kb               | 563                              | 1.0             |             |                                                     |                          |
| AIYMFVVI    | 10     | Kb               | 785                              | 1.0             |             |                                                     |                          |
| IYMFVVI     | 8      | Kb               | 52                               | 1.0             |             |                                                     |                          |
| IYMFVVI     | 9      | Kb               | 61                               | 1.0             |             |                                                     |                          |
| IYMFVVIYI   | 11     | Kb               | 67                               | 1.0             |             |                                                     |                          |
| IYMFVVI     | 8      | Kd               | 498                              | 1.1             |             |                                                     |                          |
| IYMFVVIYI   | 10     | Kd               | 673                              | 1.0             |             |                                                     |                          |
| YMFVVIYI    | 9      | Db               | 95                               | 1.1             |             |                                                     |                          |
| YMFVVIYICL  | 11     | Db               | 200                              | 1.1             |             |                                                     |                          |
| FLVVIYICL   | 9      | Db               | 609                              | 1.1             |             |                                                     |                          |
| LVVIYICL    | 8      | Kb               | 395                              | 1.1             |             |                                                     |                          |
| LVVIYICLL   | 9      | Kb               | 206                              | 1.1             |             |                                                     |                          |
| LVVIYICLLYL | 11     | Kb               | 394                              | 1.1             |             |                                                     |                          |
| VVIYICLLYL  | 10     | Kb               | 302                              | 1.1             |             |                                                     |                          |
| VVIYICLLYL  | 9      | Kb               | 78                               | 1.1             |             |                                                     |                          |
| IYICLLYL    | 8      | Kd               | 299                              | 1.0             |             |                                                     | L                        |
| IYICLLYFDL  | 11     | Kd               | 638                              | 1.0             |             |                                                     | L                        |
| ICLLYFDL    | 9      | Kb               | 312                              | 1.1             |             |                                                     |                          |
| FSVLRQHVYI  | 11     | Db               | 46                               | 1.0             | 89257107    | toxin secretion ABC transporter ATP-binding protein |                          |
| SVVLRQHVYI  | 10     | Db               | 243                              | 1.0             |             |                                                     |                          |
| VVLRQHVYI   | 9      | Kb               | 541                              | 1.0             |             |                                                     |                          |
| VVLRQHVYIGL | 11     | Kb               | 86                               | 1.0             |             |                                                     | M                        |
| RQHVIYGL    | 8      | Kb               | 203                              | 1.0             |             |                                                     |                          |
| RQHVIYGLTYI | 11     | Db               | 869                              | 1.0             |             |                                                     |                          |
| QHVIYGLTYI  | 10     | Kd               | 885                              | 1.0             |             |                                                     |                          |
| HVIYGLTYIFI | 11     | Db               | 732                              | 1.0             |             |                                                     |                          |
| VYIGLTYI    | 8      | Kd               | 19                               | 1.0             |             |                                                     |                          |
| VYIGLTYIFI  | 10     | Kd               | 400                              | 1.0             |             |                                                     |                          |
| YIGLTYIFI   | 9      | Db               | 108                              | 1.0             |             |                                                     |                          |
| IGLTYIFI    | 8      | Kb               | 137                              | 1.0             |             |                                                     |                          |
| IGLTYIFINI  | 10     | Kb               | 471                              | 1.0             |             |                                                     |                          |
| IGLTYIFINIL | 11     | Kb               | 56                               | 1.0             |             |                                                     |                          |
| LTYIFINI    | 8      | Kb               | 10                               | 1.0             |             |                                                     |                          |
| LTYIFINIL   | 9      | Kb               | 12                               | 1.0             |             |                                                     |                          |
| LTYIFINILL  | 10     | Kb               | 28                               | 1.0             |             |                                                     |                          |
| LTYIFINILLL | 11     | Kb               | 25                               | 1.0             |             |                                                     |                          |
| TYIFINIL    | 8      | Kd               | 70                               | 1.0             |             |                                                     |                          |
| TYIFINILL   | 9      | Kd               | 282                              | 1.0             |             |                                                     |                          |
| TYIFINILLL  | 10     | Kd               | 894                              | 1.0             |             |                                                     |                          |
| YIFINILL    | 9      | Kb               | 667                              | 1.0             |             |                                                     |                          |
| SQVSRRYLL   | 9      | Kb               | 448                              | 1.2             | 89257127    | aromatic amino acid transporter of the HAAAP family |                          |
| VSRRYLLF    | 8      | Kb               | 468                              | 1.2             |             |                                                     |                          |
| RRYLLFFSI   | 9      | Kb               | 535                              | 1.2             |             |                                                     |                          |
| RRYLLFFSH   | 10     | Kb               | 864                              | 1.2             |             |                                                     |                          |
| RYLLFFSI    | 8      | Kd               | 41                               | 1.2             |             |                                                     |                          |
| RYLLFFSII   | 9      | Kd               | 42                               | 1.2             |             |                                                     |                          |
| RYLLFFSIIYL | 11     | Kd               | 162                              | 1.2             |             |                                                     |                          |
| YLLFFSIIYL  | 10     | Kb               | 389                              | 1.2             |             |                                                     |                          |
| YLLFFSIIYLL | 11     | Kb               | 914                              | 1.2             |             |                                                     |                          |
| LLFFSIIYL   | 9      | Kb               | 128                              | 1.2             |             |                                                     |                          |
| LLFFSIIYLL  | 10     | Kb               | 293                              | 1.2             |             |                                                     |                          |
| LLFFSIIYLLL | 11     | Kb               | 250                              | 1.2             |             |                                                     |                          |
| LFFSIIYLL   | 9      | Kb               | 798                              | 1.2             |             |                                                     |                          |
| LFFSIIYLLL  | 10     | Kb               | 654                              | 1.2             |             |                                                     |                          |
| LFFSIIYLLLL | 11     | Kb               | 737                              | 1.2             |             |                                                     |                          |
| FSIIYLLL    | 8      | Kb               | 17                               | 1.2             |             |                                                     |                          |
| FSIIYLLLL   | 9      | Db               | 182                              | 1.2             |             |                                                     |                          |
| SIYLLLYSL   | 11     | Kb               | 78                               | 1.2             |             |                                                     |                          |

| Sequence      | Length | Predicted allele | Affinity (IC <sub>50</sub> , nM) | Cluster density | Protein gi# | Protein annotation         | Responder <sup>(a)</sup> |
|---------------|--------|------------------|----------------------------------|-----------------|-------------|----------------------------|--------------------------|
| IYLLLLYSL     | 10     | Kb               | 14                               | 1.2             |             |                            |                          |
| IYLLLLYSLI    | 11     | Kb               | 140                              | 1.2             |             |                            |                          |
| IYLLLLYSL     | 9      | Kb               | 70                               | 1.2             |             |                            |                          |
| IYLLLLYSLI    | 10     | Kd               | 74                               | 1.2             |             |                            |                          |
| FSLYLNYSSI    | 10     | Kb               | 220                              | 1.0             | 89257149    | hypothetical protein       |                          |
| SLYLYNYSSI    | 9      | Kb               | 48                               | 1.0             |             |                            |                          |
| SLYLYNYSSII   | 10     | Kb               | 378                              | 1.0             |             |                            |                          |
| SLYLYNYSSIIIP | 11     | Kb               | 763                              | 1.0             |             |                            |                          |
| LYLYNYSSI     | 8      | Kd               | 31                               | 1.0             |             |                            |                          |
| LYLYNYSSII    | 9      | Kd               | 320                              | 1.0             |             |                            |                          |
| SSIIPTYFL     | 9      | Db               | 57                               | 1.0             |             |                            |                          |
| SSIIPTYFLL    | 10     | Kb               | 245                              | 1.0             |             |                            |                          |
| SSIIPTYFLLL   | 11     | Kb               | 298                              | 1.0             |             |                            |                          |
| SIIPTYFL      | 8      | Kb               | 688                              | 1.0             |             |                            |                          |
| SIIPTYFLL     | 9      | Kb               | 420                              | 1.0             |             |                            |                          |
| SIIPTYFLLL    | 10     | Kb               | 510                              | 1.0             |             |                            |                          |
| IIPTYFLL      | 8      | Kb               | 42                               | 1.0             |             |                            |                          |
| IIPTYFLLL     | 9      | Kb               | 237                              | 1.0             |             |                            |                          |
| TYFLLFSSEI    | 11     | Kd               | 38                               | 1.0             |             |                            |                          |
| YFLLFSSEI     | 10     | Kd               | 228                              | 1.0             |             |                            |                          |
| SFLTNYAGFI    | 10     | Db               | 384                              | 1.0             | 89257164    | Competence-related protein |                          |
| ISYWSYFSF     | 9      | Kb               | 145                              | 1.0             |             |                            | M                        |
| ISYWSYFSFF    | 10     | Kb               | 462                              | 1.0             |             |                            | H                        |
| SYWSYFSFF     | 9      | Kd               | 807                              | 1.0             |             |                            | L                        |
| SYWSYFSFFSL   | 11     | Kd               | 16                               | 1.0             |             |                            | H                        |
| WSYFSFFSL     | 9      | Kb               | 24                               | 1.0             |             |                            | M                        |
| WSYFSFFSLV    | 10     | Kb               | 416                              | 1.0             |             |                            |                          |
| WSYFSFFSLVI   | 11     | Db               | 555                              | 1.0             |             |                            |                          |
| SYFSFFSL      | 8      | Kd               | 13                               | 1.0             |             |                            |                          |
| SYFSFFSLV     | 9      | Kd               | 42                               | 1.0             |             |                            |                          |
| SYFSFFSLVI    | 10     | Kd               | 145                              | 1.0             |             |                            |                          |
| SYFSFFSLVII   | 11     | Kd               | 27                               | 1.0             |             |                            |                          |
| FSFFSLVI      | 8      | Db               | 309                              | 1.0             |             |                            |                          |
| FSFFSLVII     | 9      | Db               | 197                              | 1.4             |             |                            |                          |
| FSFFSLVIII    | 10     | Db               | 256                              | 1.0             |             |                            |                          |
| FSFFSLVIIIIL  | 11     | Kb               | 137                              | 1.0             |             |                            |                          |
| SFFSLVIIIIL   | 10     | Kb               | 555                              | 1.4             |             |                            |                          |
| FSLVIIIIL     | 8      | Db               | 178                              | 1.4             |             |                            |                          |
| FSLVIIIILGII  | 11     | Db               | 397                              | 1.4             | 89257164    | Competence-related protein |                          |
| RIFVFSYT      | 8      | Kb               | 228                              | 1.0             |             |                            |                          |
| RIFVFSYTFM    | 10     | Kb               | 704                              | 1.0             |             |                            |                          |
| RIFVFSYTFML   | 11     | Kb               | 559                              | 1.0             |             |                            |                          |
| IFVFSYTFM     | 9      | Db               | 621                              | 1.0             |             |                            |                          |
| IFVFSYTFML    | 10     | Kb               | 630                              | 1.0             |             |                            |                          |
| FVFSYTFM      | 8      | Kb               | 65                               | 1.0             |             |                            |                          |
| FVFSYTFML     | 9      | Kb               | 172                              | 1.0             |             |                            |                          |
| FSYTFMLY      | 8      | Kb               | 68                               | 1.0             |             |                            |                          |
| FSYTFMLYAFI   | 11     | Db               | 35                               | 1.0             |             |                            |                          |
| SYTFMLYAFI    | 10     | Kd               | 87                               | 1.0             |             |                            |                          |
| YTFMLYAFI     | 9      | Kb               | 471                              | 1.0             |             |                            |                          |
| FMLYAFIAGTI   | 11     | Db               | 237                              | 1.0             |             |                            |                          |
| MLYAFIAGTI    | 10     | Kb               | 642                              | 1.0             |             |                            |                          |
| LYAFIAGTI     | 9      | Kd               | 45                               | 1.0             |             |                            |                          |
| LYAFIAGTII    | 10     | Kd               | 63                               | 1.0             |             |                            |                          |
| YAFIAGTIIAI   | 11     | Db               | 971                              | 1.0             |             |                            |                          |
| AFIAGTII      | 8      | Kd               | 795                              | 1.0             |             |                            |                          |
| ATASFQKYL     | 10     | Kb               | 469                              | 1.0             | 89257191    | hypothetical protein       |                          |
| ASFPQKYLQI    | 10     | Kb               | 606                              | 1.0             |             |                            |                          |
| ASFPQKYLQII   | 11     | Kb               | 937                              | 1.0             |             |                            |                          |
| QKYLQIYI      | 9      | Kb               | 745                              | 1.0             |             |                            |                          |
| QKYLQIYIL     | 10     | Kb               | 316                              | 1.0             |             |                            | L                        |
| QKYLQIYILM    | 11     | Kb               | 136                              | 1.0             |             |                            |                          |
| KYLQIYI       | 8      | Kd               | 30                               | 1.0             |             |                            |                          |
| KYLQIYIL      | 9      | Kd               | 155                              | 1.0             |             |                            |                          |
| KYLQIYILM     | 10     | Kb               | 788                              | 1.0             |             |                            | M                        |
| LQIYILM       | 8      | Kb               | 419                              | 1.0             |             |                            | M                        |
| LQIYILMM      | 9      | Kb               | 314                              | 1.0             |             |                            |                          |
| IYILMMFI      | 9      | Kb               | 564                              | 1.0             |             |                            |                          |
| IYILMMFII     | 10     | Kb               | 532                              | 1.0             |             |                            |                          |
| IYILMMFI      | 8      | Kd               | 34                               | 1.0             |             |                            |                          |
| IYILMMFII     | 9      | Kd               | 72                               | 1.0             |             |                            |                          |
| IYILMMFIIAI   | 11     | Kd               | 57                               | 1.0             |             |                            |                          |
| YILMMFII      | 8      | Db               | 850                              | 1.0             |             |                            |                          |
| YILMMFIIAI    | 10     | Kb               | 718                              | 1.0             |             |                            |                          |
| ILMMFIIAI     | 9      | Kb               | 279                              | 1.0             |             |                            |                          |
| ILMMFIIAITM   | 11     | Kb               | 113                              | 1.0             |             |                            |                          |
| LMMFIIAITM    | 10     | Kb               | 111                              | 1.0             |             |                            |                          |
| MMFIIAITM     | 9      | Kb               | 92                               | 1.0             |             |                            |                          |
| MMFIIAITMI    | 10     | Kb               | 795                              | 1.0             |             |                            |                          |
| MFIIAITMI     | 9      | Kd               | 747                              | 1.0             |             |                            |                          |
