# Supplementary material for: Whole-Genome Immunoinformatic Analysis of F. tularensis: Predicted CTL Epitopes Clustered in Hotspots Are Prone to Elicit a T-Cell Response
Source: PubMed Central journal article supplement (PMC3098878; doi:10.1371/journal.pone.0020050), 2011-05-20
Supplement: pone.0020050.s002.pdf [file pone.0020050.s002.pdf]

Supplement Table 2: Compilation of data for 500 random-based selected putative MHC binders (Subset II)

| Sequence    | Length | Predicted allele | Affinity (IC <sub>50</sub> , nM) | Cluster density | Protein gi# | Protein annotation                                              | Responder |
|-------------|--------|------------------|----------------------------------|-----------------|-------------|-----------------------------------------------------------------|-----------|
| SYLDNPNM    | 9      | Kb               | 192                              | 0.2             | 89255451    | DNA polymerase III, beta chain                                  |           |
| RALYTQVLKFL | 11     | Kb               | 475                              | 0.4             | 89255455    | indolepyruvate decarboxylase                                    |           |
| QYFSKSVL    | 8      | Kd               | 30                               | 0.5             | 89255464    | propionate kinase                                               |           |
| IKYLNNTLMNL | 10     | Kb               | 49                               | 0.3             | 89255465    | phosphate acetyltransferase                                     |           |
| VVLNRFDKL   | 9      | Kb               | 65                               | 0.6             | 89255469    | Proline/betaine transporter, MFS transport protein              |           |
| LPLSISLL    | 9      | Kb               | 499                              | 0.5             |             |                                                                 |           |
| FLLSFFTL    | 9      | Kb               | 374                              | 0.5             | 89255471    | serine transporter                                              |           |
| INIAKQHLLPL | 11     | Kb               | 200                              | 0.3             | 89255472    | hypothetical protein                                            |           |
| QTPLKLVLSAL | 10     | Kb               | 291                              | 0.5             | 89255476    | Carbamoyl-phosphate synthase large chain                        |           |
| VHFDNTIPL   | 9      | Kb               | 61                               | 0.3             | 89255480    | Dihydroorotase                                                  |           |
| TIFMYFALL   | 9      | Kb               | 31                               | NO              | 89255484    | hypothetical membrane protein                                   |           |
| IAIIINDAL   | 9      | Kb               | 254                              | 0.5             |             |                                                                 |           |
| IALELKDIVI  | 10     | Db               | 434                              | NO              | 89255485    | HlyD family secretion protein                                   |           |
| GTGSGNHVT   | 9      | Dd               | 242                              | 0.3             | 89255491    | Transglutaminase-like superfamily domain protein                |           |
| AFITGGFGAI  | 10     | Kd               | 121                              | 0.2             | 89255498    | hypothetical protein                                            |           |
| SSFOLLPTL   | 9      | Kb               | 15                               | 0.4             | 89255505    | aromatic amino acid transporter of the HAAAP family             |           |
| LFFLVNCIS   | 9      | Kd               | 157                              | 0.5             | 89255508    | hypothetical membrane protein                                   |           |
| VAYTVYFPGI  | 10     | Kb               | 12                               | 0.2             | 89255516    | hypothetical membrane protein                                   |           |
| IDPELYTHM   | 10     | Kb               | 467                              | 0.4             |             |                                                                 |           |
| AYIGMIKL    | 8      | Kd               | 170                              | 0.5             | 89255522    | Transposase                                                     |           |
| INFASNIVL   | 9      | Kb               | 441                              | NO              | 89255526    | conserved hypothetical protein                                  |           |
| FSIWSVFM    | 8      | Db               | 64                               | 0.2             | 89255530    | hypothetical membrane protein                                   |           |
| LIFWFWTFSI  | 10     | Kb               | 183                              | 0.2             |             |                                                                 |           |
| STLKQISKL   | 9      | Kb               | 177                              | 0.3             | 89255536    | tryptophan synthase alpha chain                                 |           |
| GRGDKDIF    | 9      | Dd               | 489                              | NO              | 89255537    | tryptophan synthase beta chain                                  |           |
| ITPFNFSDGIL | 11     | Kb               | 249                              | 0.4             | 89255538    | Carboxypeptidase, fragment                                      |           |
| LIFFSAIL    | 9      | Kb               | 332                              | 0.5             | 89255545    | major facilitator superfamily (MFS) transport protein, fragment |           |
| LSNLELYPI   | 9      | Db               | 452                              | 0.2             | 89255550    | intracellular growth locus, subunit C                           |           |
| HSYGFKHSI   | 9      | Kb               | 386                              | 0.3             | 89255551    | intracellular growth locus, subunit D                           |           |
| VMLKVAQL    | 8      | Kb               | 45                               | 0.2             | 89255553    | conserved hypothetical protein                                  |           |
| LSYINAFI    | 8      | Kb               | 79                               | 0.1             |             |                                                                 |           |
| YYIPEENF    | 9      | Kd               | 295                              | 0.4             |             |                                                                 |           |
| ANFFARPVFKL | 11     | Kb               | 324                              | 0.3             |             |                                                                 |           |
| CYQTISLI    | 8      | Kd               | 28                               | 0.5             | 89255556    | conserved hypothetical protein                                  |           |
| VSLINYVINSV | 11     | Kb               | 86                               | 0.4             | 89255562    | conserved hypothetical protein                                  |           |
| SAATNEAI    | 8      | Db               | 425                              | NO              |             |                                                                 |           |
| SMITSLIFF   | 10     | Db               | 500                              | 0.4             |             |                                                                 |           |
| EYIQSNDDI   | 10     | Kd               | 44                               | NO              | 89255563    | conserved hypothetical protein                                  |           |
| ENFFFDNLVSL | 11     | Kb               | 106                              | 0.2             |             |                                                                 |           |
| KYLSTKINF   | 9      | Kd               | 226                              | 0.5             | 89255570    | ferrous iron transport protein                                  |           |
| CGKTTIFNAL  | 10     | Kb               | 414                              | 0.3             |             |                                                                 |           |
| TSINKGLPIL  | 10     | Kb               | 226                              | NO              | 89255576    | Carboxylesterase/phospholipase family protein                   |           |
| NIYMTTVDL   | 9      | Kb               | 392                              | 0.4             | 89255584    | hypothetical protein                                            |           |
| VAYFQIMILP  | 10     | Kb               | 117                              | 0.6             | 89255596    | major facilitator superfamily (MFS) transport protein, fragment |           |
| QYNILKFL    | 8      | Kd               | 155                              | 0.2             | 89255601    | DNA/RNA helicase                                                |           |
| YVQVQATACI  | 10     | Db               | 152                              | 0.3             | 89255606    | UDP-N-acetylmuramate-alanine ligase                             |           |
| VIITNIDLDM  | 11     | Db               | 191                              | 0.1             |             |                                                                 |           |
| FVPYQSSPL   | 9      | Dd               | 107                              | 0.4             | 89255617    | Oligoribonuclease                                               |           |
| IVVFLILL    | 9      | Kb               | 122                              | 0.3             | 89255620    | major facilitator superfamily (MFS) transport protein, fragment |           |
| LGLFLHFI    | 9      | Kb               | 423                              | 0.7             |             |                                                                 |           |
| LIYSFRMIGL  | 10     | Kb               | 24                               | 0.4             | 89255624    | major facilitator superfamily (MFS) transport protein           |           |
| ADYQWLVL    | 9      | Kb               | 64                               | 0.6             |             |                                                                 |           |
| YMMPNYKPGDM | 11     | Db               | 112                              | 0.3             | 89255625    | Cytochrome O ubiquinol oxidase subunit II                       |           |
| YAMTGMTTQL  | 10     | Db               | 114                              | 0.3             |             |                                                                 |           |
| QIPHSYAIAM  | 10     | Dd               | 445                              | 0.4             | 89255629    | Protoheme IX farnesyltransferase                                |           |
| TGNHNQII    | 9      | Db               | 498                              | NO              | 89255632    | Pyridoxal/pyridoxine/pyridoxamine kinase                        |           |
| SVYNHFQELL  | 10     | Kb               | 20                               | 0.5             | 89255634    | methanol dehydrogenase regulatory protein                       |           |
| TNLDQKVSGL  | 10     | Kb               | 324                              | 0.2             | 89255640    | conserved hypothetical membrane protein                         |           |
| VAEIFPHL    | 8      | Kb               | 335                              | NO              |             |                                                                 |           |
| CNHVMYHLL   | 9      | Kb               | 322                              | 0.3             | 89255641    | Pyrrolidone-carboxylate peptidase                               |           |
| KAHLNDAKDTI | 11     | Db               | 35                               | 0.3             | 89255644    | Valyl-tRNA synthetase                                           |           |
| FNPYGVGAV   | 9      | Dd               | 138                              | 0.3             | 89255655    | amino acid permease                                             |           |
| YTSFNTWFI   | 9      | Db               | 31                               | 0.4             | 89255665    | phosphatidylglycerophosphate synthetase                         |           |
| VRAERYVKHPL | 11     | Kb               | 430                              | NO              | 89255679    | 30S ribosomal protein S17                                       |           |
| AVLLNANGQPI | 11     | Db               | 71                               | 0.2             | 89255680    | 50S ribosomal protein L14                                       |           |
| SAVVPKFIEL  | 10     | Kb               | 271                              | 0.7             | 89255690    | preprotein translocase, subunit Y, membrane protein             |           |
| DHPDASTL    | 8      | Dd               | 424                              | 0.2             | 89255697    | Transposase                                                     |           |
| ILYLPYSPDL  | 11     | Kb               | 138                              | 0.4             | 89255699    | Transposase                                                     |           |
| KYEEGMTEF   | 9      | Kd               | 298                              | 0.2             |             |                                                                 |           |
| AAVTFLPTSL  | 11     | Kb               | 126                              | 0.7             | 89255706    | Glutamate/gamma-aminobutyrate anti-porter                       |           |
| VVFFAVKTAL  | 10     | Kb               | 78                               | 0.4             | 89255708    | conserved hypothetical membrane protein                         |           |
| NAPAGDLIY   | 9      | Dd               | 86                               | NO              | 89255713    | heat shock protein, hsp40                                       |           |
| TSFGFHIV    | 8      | Kb               | 239                              | 0.3             | 89255715    | aromatic amino acid transporter of the HAAAP family             |           |
| EYNSVKSNNNI | 11     | Kd               | 13                               | 0.2             | 89255716    | hypothetical protein                                            |           |
| RNPYVKV     | 8      | Kb               | 56                               | 0.4             | 89255720    | hypothetical membrane protein                                   |           |
| IGLLTTKSI   | 9      | Kb               | 247                              | 0.8             | 89255729    | hypothetical membrane protein                                   |           |
| FSFVIMVML   | 9      | Kb               | 328                              | 0.7             |             |                                                                 |           |
| FGYKYREDNAI | 11     | Kb               | 232                              | 0.3             | 89255732    | hypothetical protein                                            |           |
| KSVQNPDL    | 8      | Db               | 239                              | 0.2             | 89255733    | Transposase                                                     |           |
| IGFAADTPAGL | 11     | Kb               | 98                               | 0.1             | 89255741    | pyruvate dehydrogenase, E2 component                            |           |
| IIFCVMIFL   | 9      | Kb               | 280                              | 0.6             | 89255749    | Hypothetical protein yieG                                       |           |
| SYLNNVFGGL  | 10     | Kd               | 47                               | 0.7             | 89255750    | L-aspartate-beta-decarboxylase                                  |           |
| HIYLRGAKAL  | 10     | Kb               | 389                              | 0.3             | 89255754    | chorismate mutase                                               |           |
| ASLLFAFLAI  | 11     | Kb               | 367                              | 0.6             | 89255755    | CDP-alcohol phosphatidyltransferase                             |           |
| IVYSSYSGGSM | 11     | Kb               | 38                               | 0.5             | 89255760    | TolB protein precursor                                          |           |
| DGYNKHVVL   | 9      | Kb               | 115                              | 0.2             |             |                                                                 |           |
| SNLYARYGRL  | 10     | Kb               | 143                              | 0.2             |             |                                                                 |           |
| KIYLIGFFAL  | 10     | Kb               | 275                              | 0.7             | 89255761    | hypothetical lipoprotein                                        |           |
| SQLNRRWRL   | 9      | Kb               | 227                              | 0.3             | 89255775    | hypothetical protein                                            |           |
| SYLVIFTI    | 8      | Kd               | 16                               | 0.4             | 89255776    | 4-hydroxybenzoate octaprenyltransferase                         |           |

H

| Sequence    | Length | Predicted allele | Affinity (IC <sub>50</sub> , nM) | Cluster density | Protein gi# | Protein annotation                                                  | Responder |
|-------------|--------|------------------|----------------------------------|-----------------|-------------|---------------------------------------------------------------------|-----------|
| LSLLLLIL    | 9      | Kb               | 79                               | 1               |             |                                                                     |           |
| VTFSMYDKI   | 9      | Kb               | 188                              | 0.4             | 89255781    | heat shock protein HtpX                                             |           |
| LNLFMTVLNSM | 11     | Kb               | 373                              | 0.7             | 89255781    |                                                                     |           |
| KYMDYEQTTL  | 10     | Kd               | 35                               | 0.6             | 89255782    | LemA-like protein                                                   |           |
| VYVMTYNNKL  | 10     | Kd               | 253                              | 0.2             |             |                                                                     |           |
| TAFYKLCGMSM | 11     | Kb               | 31                               | 0.4             | 89255794    | superoxide dismutase (Cu-Zn) precursor                              |           |
| TGAFYVIACL  | 10     | Kb               | 154                              | 0.4             | 89255798    | aspartate transaminase                                              |           |
| IVYFAQSLTV  | 10     | Kb               | 457                              | 0.7             | 89255799    | cation transporter                                                  |           |
| AMDSLQSSL   | 9      | Kb               | 493                              | 0.4             | 89255801    | Type IV pili fiber building block protein                           |           |
| VAISGLGQIL  | 11     | Kb               | 492                              | 0.2             | 89255804    | conserved hypothetical membrane protein                             |           |
| VVELSQYITL  | 11     | Kb               | 429                              | 0.4             | 89255807    | Fusion protein PurC/PurD                                            |           |
| FSRLFQSV    | 8      | Kb               | 324                              | 0.2             | 89255811    | Transposase                                                         |           |
| SGFDYFYLL   | 9      | Kb               | 37                               | 0.2             | 89255820    | Purine/pyrimidine phosphoribosyl transferase family protein         |           |
| MSFLVAIV    | 8      | Kb               | 102                              | NO              | 89255825    | GTP-binding protein                                                 |           |
| LAQSNLENAL  | 10     | Kb               | 273                              | 0.2             | 89255830    | Oligopeptidase A                                                    |           |
| FMGRKPNEDEL | 11     | Db               | 408                              | 0.3             |             |                                                                     |           |
| AEYIILPLL   | 10     | Kb               | 150                              | 0.5             | 89255835    | Type IV pili glycosylation protein                                  |           |
| MPFMHYTVLNL | 11     | Kb               | 424                              | 0.3             |             |                                                                     |           |
| YSLINDCV    | 8      | Db               | 55                               | 0.5             | 89255840    | hypothetical protein                                                |           |
| IAAIVLIVL   | 9      | Kb               | 222                              | 0.8             | 89255845    | lipoprotein signal peptidase II                                     |           |
| DALLNAPGYL  | 10     | Kb               | 483                              | 0.2             | 89255848    | NAD-dependent malic enzyme                                          |           |
| ANFVGAGL    | 8      | Kb               | 323                              | 0.2             | 89255853    | major facilitator superfamily (MFS) transport protein               |           |
| IAVQFLIEGEI | 11     | Kb               | 96                               | 0.4             | 89255857    | conserved hypothetical membrane protein                             |           |
| TNILLKVLPL  | 11     | Kb               | 156                              | 0.3             |             |                                                                     |           |
| SKYKIKTADLM | 11     | Kb               | 207                              | 0.2             | 89255871    | conserved hypothetical protein                                      |           |
| AAMRYTESRL  | 10     | Kb               | 131                              | 0.4             | 89255872    | DNA topoisomerase IV subunit A                                      |           |
| IGYSLTTQQV  | 10     | Kb               | 192                              | 0.2             | 89255876    | soluble lytic murein transglycosylase                               |           |
| AYHSNEIRQHI | 11     | Kd               | 62                               | NO              | 89255878    | Transposase                                                         |           |
| FVFINANTI   | 9      | Db               | 115                              | 0.7             | 89255879    | hypothetical protein                                                |           |
| SKLCYQGL    | 8      | Kb               | 256                              | 0.3             | 89255882    | DNA polymerase III alpha subunit                                    |           |
| FGTNNYIEI   | 10     | Db               | 498                              | 0.2             |             |                                                                     |           |
| TGMDASNASM  | 10     | Kb               | 286                              | 0.4             | 89255889    | glycine cleavage system P protein, subunit 1                        |           |
| IDTNFYPL    | 8      | Kb               | 91                               | 0.3             | 89255890    | glycine cleavage system P protein, subunit 2                        |           |
| FTHLNATHQV  | 10     | Db               | 361                              | 0.2             | 89255892    | pullulanase                                                         |           |
| QYKSHSL     | 8      | Kd               | 484                              | 0.6             | 89255895    | Glucose-1-phosphate adenylyltransferase                             |           |
| YGVNLGVDPQI | 11     | Db               | 481                              | 0.2             | 89255896    | glycogen synthase                                                   |           |
| NGPLYRDVFL  | 11     | Kb               | 467                              | 0.3             | 89255899    | Glycyl-tRNA synthetase alpha chain                                  |           |
| LSQNFQIESL  | 11     | Kb               | 101                              | 0.2             | 89255900    | UDP-N-acetylmuramoylalanyl-D-glutamate--2,6- diaminopimelate ligase |           |
| LNSYNPNL    | 9      | Kb               | 397                              | 0.2             |             |                                                                     |           |
| AMQELLQQTSL | 11     | Kb               | 445                              | 0.1             | 89255904    | aspartate semialdehyde dehydrogenase                                |           |
| KVINKSMDEL  | 11     | Db               | 95                               | 0.2             | 89255905    | threonine synthase                                                  |           |
| AQYFAGERL   | 9      | Kb               | 109                              | 0.3             | 89255909    | conserved hypothetical protein                                      |           |
| HAAVNMLPV   | 9      | Db               | 87                               | 0.3             | 89255912    | Carbon-nitrogen hydrolase family protein                            |           |
| VMNVNPIFIL  | 11     | Db               | 226                              | 0.3             | 89255923    | ABC transporter, membrane protein                                   |           |
| KSYPNDFAYL  | 10     | Kb               | 111                              | 0.2             | 89255935    | Type III restriction enzyme                                         |           |
| TMLCFSSL    | 8      | Kb               | 41                               | 0.3             | 89255940    | DNA gyrase, subunit A                                               |           |
| AGIKTHYVSP  | 11     | Kb               | 493                              | 0.2             | 89255947    | Lipid-A-disaccharide synthase                                       |           |
| HIYSIFITL   | 10     | Kb               | 218                              | 0.7             | 89255953    | 3-Deoxy-D-manno-octulosonic-acid transferase                        |           |
| NTYFSKLSL   | 10     | Kb               | 127                              | 0.7             | 89255965    | Cyclopropane-fatty-acid-phospholipid synthase                       |           |
| ISYGPMTFGQL | 11     | Kb               | 57                               | 0.7             | 89255979    | sugar transport protein                                             |           |
| VYISETSV    | 8      | Kd               | 69                               | 0.4             |             |                                                                     |           |
| NVFISYGPTM  | 10     | Kb               | 295                              | 0.4             |             |                                                                     |           |
| TTLMLSRLL   | 9      | Kb               | 348                              | 0.3             |             |                                                                     |           |
| SAPKHVEQL   | 9      | Kb               | 91                               | NO              | 89255986    | isocitrate dehydrogenase                                            |           |
| DNYLSQPMIVL | 11     | Kb               | 192                              | 0.3             | 89255988    | ATP-dependent helicase                                              |           |
| FYGVVTFSL   | 9      | Kd               | 22                               | 0.5             | 89255990    | dTDP-glucose 4,6-dehydratase                                        |           |
| FFFFLSMIYL  | 11     | Kb               | 253                              | 0.4             | 89255996    | Membrane protein/O-antigen protein                                  |           |
| VGLFTKLITIL | 11     | Kb               | 98                               | 1.1             | 89255996    | asparagine synthase                                                 |           |
| FGIQNGIL    | 8      | Db               | 161                              | 0.2             |             |                                                                     |           |
| RYFYPSLDSL  | 10     | Kd               | 297                              | 0.7             | 89255999    | sugar transamine/perosamine synthetase                              |           |
| TVFQTVLRL   | 9      | Kb               | 118                              | 0.4             | 89256001    | O-antigen flippase                                                  |           |
| IYNTYAGL    | 8      | Kb               | 59                               | 0.5             | 89256002    | Glycosyltransferase                                                 | M         |
| NDPHRYGIVEF | 11     | Dd               | 106                              | 0.2             | 89256003    | Glucose-1-phosphate thymidyltransferase                             |           |
| YSGYNTIEIF  | 10     | Dd               | 319                              | 0.4             | 89256005    | Transposase                                                         |           |
| SAMTDKICWL  | 10     | Db               | 262                              | 0.2             | 89256007    | Phosphomannomutase                                                  |           |
| SYFASPDDIYV | 11     | Kd               | 184                              | 0.4             | 89256007    | transcription termination factor Rho                                |           |
| VTLTNQDI    | 8      | Db               | 425                              | 0.3             |             |                                                                     |           |
| AIFWLSVML   | 9      | Kb               | 106                              | 0.5             | 89256012    | ATPase, AAA family                                                  |           |
| IRFSKAIPELL | 11     | Kb               | 363                              | 0.2             | 89256018    | ABC transporter, membrane protein                                   |           |
| FTFVLYYL    | 8      | Kb               | 70                               | 0.6             | 89256018    | NADH oxidase                                                        |           |
| AGPANKQGRLL | 10     | Kb               | 379                              | 0.2             |             |                                                                     |           |
| YIMISHYDITI | 11     | Db               | 158                              | 0.5             | 89256027    | conserved hypothetical membrane protein                             |           |
| SILAVPLL    | 8      | Kb               | 325                              | 0.2             |             |                                                                     |           |
| KQYGYPIV    | 8      | Kb               | 120                              | 0.2             | 89256038    | hypothetical protein                                                |           |
| IYTSIAEASLL | 11     | Kd               | 323                              | 0.5             | 89256054    | conserved hypothetical membrane protein                             |           |
| ISLAMSSLVLL | 11     | Kb               | 77                               | 0.6             | 89256054    | conserved hypothetical membrane                                     |           |
| MVILLSLSL   | 9      | Kb               | 416                              | 0.8             |             |                                                                     |           |
| SVPFRVIAML  | 10     | Kb               | 80                               | 0.5             | 89256056    | Exodeoxyribonuclease V gamma chain                                  |           |
| QFKPINSVL   | 9      | Kd               | 259                              | 0.1             | 89256066    | DNA ligase                                                          |           |
| LAYQTKRRSIV | 11     | Kb               | 278                              | 0.3             | 89256068    | Transposase                                                         |           |
| SFFKITLPL   | 9      | Kb               | 409                              | 0.4             | 89256070    | polyamine transporter, subunit H, ABC transporter, membrane protein |           |
| SAAMAYLPTM  | 10     | Kb               | 89                               | 0.8             | 89256077    | major facilitator superfamily (MFS) transport protein               |           |
| YLLAINMGGL  | 10     | Kd               | 30                               | 0.7             | 89256080    | Proton-dependent oligopeptide transport (POT) family protein        |           |
| YQFLNPLWIL  | 10     | Db               | 91                               | 0.8             |             |                                                                     |           |
| KMLTVATFEYI | 11     | Db               | 141                              | 0.3             | 89256083    | hypothetical protein                                                |           |
| TYGIVTNL    | 8      | Kd               | 131                              | 0.3             | 89256090    | FAD binding family protein                                          |           |
| LYADANTL    | 8      | Kd               | 275                              | 0.3             | 89256091    | hypothetical protein                                                |           |
| AGFSAFSGI   | 9      | Kb               | 472                              | 0.1             | 89256092    | serine hydroxymethyltransferase                                     |           |
| ISQILSKTIAL | 11     | Kb               | 223                              | 0.5             | 89256094    | hypothetical membrane protein                                       |           |
| LPFKYVTL    | 8      | Kb               | 141                              | 0.7             | 89256096    | glycosyl transferase family 8 protein                               |           |
| SYASKYSII   | 9      | Kd               | 38                               | 0.2             | 89256099    | choloylecine hydrolase family protein                               |           |
| TVIKDLNKKL  | 11     | Kb               | 442                              | 0.6             |             |                                                                     |           |
| KYIKENGV    | 8      | Kd               | 60                               | 0.3             | 89256104    | thymidylate synthase                                                |           |
| SYPGILSVTFL | 11     | Kd               | 222                              | 0.3             | 89256107    | cysteine desulfarase                                                |           |

| Sequence    | Length | Predicted allele | Affinity (IC <sub>50</sub> , nM) | Cluster density | Protein gi# | Protein annotation                                                       | Responder |
|-------------|--------|------------------|----------------------------------|-----------------|-------------|--------------------------------------------------------------------------|-----------|
| KYLSIETSL   | 9      | Kd               | 1                                | 0.3             | 89256116    | monoxygenase family protein                                              |           |
| FALALMYAI   | 9      | Db               | 57                               | 0.5             | 89256124    | hypothetical membrane protein                                            |           |
| ILLDDMFISL  | 11     | Kb               | 219                              | 0.2             | 89256127    | hypothetical membrane protein                                            |           |
| KYRLEISYI   | 9      | Kd               | 230                              | 0.2             |             |                                                                          |           |
| AIYQDFMMSM  | 10     | Kb               | 53                               | 0.3             | 89256131    | Exodeoxyribonuclease I                                                   |           |
| QDYLNKIVSL  | 10     | Kb               | 297                              | 0.5             |             |                                                                          |           |
| LFNCLITPL   | 9      | Kd               | 103                              | 0.3             | 89256144    | SsrA (tmRNA)-binding protein                                             |           |
| LGPVFRGL    | 8      | Kb               | 28                               | NO              | 89256145    | conserved hypothetical protein                                           |           |
| VNYSVYGL    | 8      | Kb               | 10                               | 0.4             | 89256148    | VacJ lipoprotein                                                         |           |
| AALRNAYI    | 8      | Db               | 35                               | 0.4             |             |                                                                          |           |
| EYLRHNKCP   | 11     | Kd               | 27                               | 0.1             | 89256150    | conserved hypothetical protein                                           |           |
| IKIQMQQRQKL | 11     | Kb               | 194                              | 0.2             | 89256157    | hypothetical lipoprotein                                                 |           |
| AAFNLPIEL   | 10     | Kb               | 77                               | NO              | 89256159    | N-acetylglucosamine-6-phosphate deacetylase                              |           |
| LSLQKQSKNEL | 11     | Kb               | 70                               | 0.3             | 89256172    | 3-dehydroquinase synthetase                                              |           |
| YVDLYLANL   | 9      | Kb               | 369                              | 0.4             | 89256175    | bifunctional proline dehydrogenase,pyrroline-5-carboxylate dehydrogenase |           |
| DIPNNSQF    | 8      | Dd               | 315                              | 0.2             | 89256176    | amino acid transporter family protein                                    |           |
| LGLGYSFLL   | 10     | Kb               | 345                              | 0.4             |             |                                                                          |           |
| SNFIFLYGI   | 9      | Kb               | 355                              | 0.9             | 89256177    | major facilitator superfamily (MFS) transport protein                    |           |
| SYQQSMAHINL | 11     | Kd               | 35                               | 0.3             | 89256178    | bifunctional 4-phosphopantothienoylcysteine decarboxylase                |           |
| INPYDANKF   | 9      | Dd               | 362                              | 0.2             | 89256184    | Ferrochelatase                                                           |           |
| FCYGGGFRSAL | 11     | Kd               | 7                                | 0.3             | 89256194    | Rhodanese-like family protein                                            |           |
| IYCWIL      | 8      | Kb               | 194                              | 0.2             | 89256195    | aromatic amino acid transporter of the HAAAP family                      |           |
| RSIPYIIL    | 8      | Kb               | 46                               | 0.4             | 89256197    | D-methionine binding transport protein, ABC transporter                  |           |
| LILLYPLTRL  | 10     | Kb               | 186                              | 0.7             |             |                                                                          |           |
| VAIENSYTF   | 9      | Db               | 85                               | 0.4             | 89256201    | hypothetical lipoprotein                                                 |           |
| TIHNLTFYQNL | 11     | Kb               | 283                              | 0.3             | 89256203    | queuine tRNA-ribosyltransferase.                                         |           |
| TYMRRNINAL  | 10     | Kb               | 67                               | 0.3             | 89256208    | preprotein translocase, subunit D, membrane protein                      |           |
| KYTTVFSVL   | 9      | Kd               | 3                                | 0.4             | 89256209    | preprotein translocase, subunit F, membrane protein                      |           |
| TFMTLAAI    | 8      | Kd               | 242                              | 0.4             | 89256212    | 3-phosphoshikimate 1-carboxyvinyltransferase                             |           |
| ANYHTDSSL   | 9      | Kb               | 132                              | 0.2             | 89256218    | conserved hypothetical protein                                           |           |
| FHYWIKPL    | 8      | Kb               | 324                              | 0.1             |             |                                                                          |           |
| KYICIVCGLI  | 10     | Kd               | 14                               | 0.3             | 89256219    | Rubredoxin                                                               |           |
| IGVDESKYNLL | 11     | Kb               | 208                              | NO              | 89256220    | hypothetical protein                                                     |           |
| TFAPTMGTTL  | 10     | Kd               | 35                               | 0.5             | 89256223    | Sodium-dicarboxylate symporter family protein                            |           |
| FMIIFFSAM   | 9      | Kb               | 43                               | 0.4             | 89256225    | major facilitator superfamily (MFS) transport protein                    |           |
| YSVESYNFLL  | 10     | Db               | 244                              | 0.5             |             |                                                                          |           |
| SYNFLLFSRLI | 11     | Kd               | 442                              | 0.6             |             |                                                                          |           |
| LSYANDTYFDL | 11     | Kb               | 54                               | 0.5             | 89256229    | hypothetical protein                                                     |           |
| SYKSTLELL   | 9      | Kd               | 44                               | 0.6             | 89256235    | Peptidase, M24 family protein                                            |           |
| ESYHFPICSV  | 10     | Kb               | 494                              | 0.3             | 89256237    | beta-lactamase                                                           |           |
| VSGQFSPKSIM | 11     | Kb               | 372                              | 0.3             | 89256239    | hypothetical protein                                                     |           |
| SQMIHQPL    | 9      | Kb               | 101                              | 0.4             | 89256249    | ATP-dependent Clp protease subunit P                                     |           |
| LLLSLYEEL   | 10     | Kb               | 242                              | 0.5             | 89256251    | DNA-binding, ATP-dependent protease La                                   |           |
| LPPSTNIHL   | 9      | Dd               | 181                              | 0.5             | 89256268    | Transcription-repair coupling factor,ATP-dependent                       |           |
| INIKFYSFL   | 10     | Kb               | 422                              | 0.3             | 89256270    | hypothetical membrane protein                                            |           |
| IYDYCEF     | 8      | Kb               | 171                              | NO              | 89256270    | Endonuclease III                                                         |           |
| IYFGWRFKFI  | 11     | Kb               | 365                              | 0.8             |             |                                                                          |           |
| ISINLGSLL   | 9      | Kb               | 308                              | 0.8             | 89256276    | Proton-dependent oligopeptide transport (POT) family protein             |           |
| KYTTDHGFYAV | 11     | Kd               | 243                              | NO              | 89256278    | lipoic acid synthetase                                                   |           |
| ASYSVAFWL   | 10     | Kb               | 141                              | 0.4             | 89256282    | major facilitator superfamily (MFS) transport protein                    |           |
| TQLRQNNLSL  | 10     | Kb               | 105                              | 0.2             | 89256284    | DNA recombination protein RmuC family protein                            |           |
| TYKSKYSPF   | 9      | Dd               | 236                              | 0.1             | 89256288    | hypothetical protein                                                     |           |
| AFPLKNDYI   | 10     | Kd               | 174                              | 0.2             | 89256289    | histidine decarboxylase                                                  |           |
| LNFYLIANV   | 10     | Kb               | 339                              | 0.6             | 89256293    | nicotinamide mononucleotide transport (NMT) family protein               |           |
| FSFVLISM    | 8      | Kb               | 169                              | 0.4             | 89256294    | Sodium/hydrogen exchanger family protein                                 |           |
| EYIDLSNSI   | 9      | Kd               | 130                              | 0.4             | 89256300    | conserved hypothetical membrane protein                                  |           |
| AKADFYTRL   | 9      | Kb               | 207                              | 0.3             | 89256304    | GTP-binding protein                                                      |           |
| TLFKKASRL   | 9      | Kb               | 331                              | 0.6             | 89256312    | Proton-dependent oligopeptide transport (POT) family protein             |           |
| CSILKQYIAL  | 10     | Kb               | 35                               | 0.7             | 89256313    | ATP-dependent protease, ATP-binding subunit                              |           |
| VYPNRRNDIVL | 11     | Dd               | 120                              | 0.4             | 89256316    | Lipoate-protein ligase A                                                 |           |
| KYQIKNTM    | 8      | Kd               | 92                               | 0.2             | 89256320    | FAD linked oxidase                                                       |           |
| VAYSFGDMNL  | 10     | Kb               | 34                               | 0.2             | 89256320    | Ribonucleoside-diphosphate reductase, alpha subunit                      |           |
| KYNRLWDV    | 8      | Kd               | 45                               | 0.3             |             |                                                                          |           |
| GKHYYFESL   | 9      | Kb               | 337                              | 0.4             | 89256338    | hypothetical protein                                                     |           |
| IHINAWFNVL  | 10     | Kb               | 460                              | 0.1             | 89256339    | haloacid dehalogenase                                                    |           |
| AAYPYVRAI   | 9      | Kb               | 469                              | 0.3             | 89256356    | cytidylate kinase                                                        |           |
| VVPTSIIQQL  | 10     | Kb               | 343                              | 0.3             | 89256357    | phosphoserine aminotransferase                                           |           |
| FSKEYKYL    | 8      | Kb               | 51                               | 0.3             | 89256360    | hypothetical protein                                                     |           |
| IYFIIFLPQTI | 11     | Kd               | 327                              | 0.7             | 89256377    | hypothetical membrane protein                                            |           |
| SNFRFTTSI   | 9      | Kb               | 109                              | 0.2             | 89256384    | D-alanyl-D-alanine carboxypeptidase (Penicillin binding protein)         |           |
| EGYMDVVGL   | 9      | Kb               | 238                              | 0.2             | 89256387    | DNA primase                                                              |           |
| STILSYPIVI  | 10     | Db               | 111                              | 0.5             | 89256388    | RNA polymerase sigma-70 factor                                           |           |
| GLVNTVLTL   | 9      | Db               | 312                              | 0.5             | 89256391    | putative alpha-xylosidase                                                |           |
| INPYLVKDYPL | 11     | Kb               | 118                              | 0.4             | 89256392    | putative alpha-xylosidase                                                |           |
| SGYLTKAKTM  | 11     | Kb               | 33                               | 0.2             | 89256402    | conserved hypothetical protein                                           |           |
| SGLIGHSELM  | 10     | Kb               | 375                              | 0.2             | 89256409    | GDSL-like Lipase/Acylhydrolase family protein                            |           |
| SSIYFIKGL   | 9      | Kb               | 21                               | 0.4             | 89256411    | short chain dehydrogenase family protein                                 |           |
| TARGRIATL   | 9      | Kb               | 415                              | 0.3             | 89256412    | holliday junction DNA helicase, subunit B                                |           |
| GYITNLAEI   | 9      | Kd               | 12                               | 0.5             | 89256424    | rRNA methyltransferase                                                   |           |
| TILRTAIAVGL | 11     | Kb               | 315                              | 0.2             |             |                                                                          |           |
| CAFLIADGVL  | 10     | Kb               | 208                              | NO              | 89256431    | Alanyl-tRNA synthetase                                                   |           |
| LNQYYQFL    | 8      | Kb               | 391                              | 0.9             | 89256432    | conserved hypothetical protein                                           |           |
| LFLNLVYFTL  | 11     | Kb               | 48                               | 0.9             | 89256438    | conserved hypothetical membrane protein                                  |           |
| IYVYLLYSWEL | 11     | Kd               | 498                              | 0.7             |             |                                                                          |           |
| CTFENKNSL   | 10     | Kb               | 29                               | NO              | 89256439    | isochorismatase hydrolase family protein                                 |           |
| FIYQEQKYL   | 10     | Kb               | 58                               | 0.3             | 89256441    | ATP-dependent DNA helicase                                               |           |
| ISFWKSAL    | 8      | Kb               | 172                              | 0.3             |             |                                                                          |           |
| AQPISISIPL  | 10     | Kb               | 214                              | 0.2             | 89256450    | transcription regulator                                                  |           |
| KYEEGMTEFEL | 11     | Kd               | 47                               | 0.2             | 89256452    | Transposase                                                              |           |
| HAVSQYWL    | 8      | Db               | 245                              | 0.3             | 89256453    | hypothetical protein                                                     |           |
| VTVKMIRVM   | 9      | Kb               | 403                              | 0.4             | 89256458    | conserved hypothetical membrane protein                                  |           |
| GALPIFAAYL  | 11     | Kb               | 392                              | 0.3             | 89256459    | conserved hypothetical membrane protein                                  |           |
| CAMSAILGL   | 9      | Kb               | 303                              | 0.1             | 89256464    | malonyl coA-acyl carrier protein transacylase                            |           |
| IKYSIKAKLQL | 11     | Kb               | 163                              | 0.4             | 89256468    | conserved hypothetical protein                                           |           |

| Sequence    | Length | Predicted allele | Affinity (IC <sub>50</sub> , nM) | Cluster density | Protein gi# | Protein annotation                                                   | Responder |
|-------------|--------|------------------|----------------------------------|-----------------|-------------|----------------------------------------------------------------------|-----------|
| QYKQMWFS    | 9      | Kd               | 331                              | 0.3             | 89256475    | Trehalase, pseudogene                                                |           |
| IAFDEQDLERL | 11     | Kb               | 85                               | NO              | 89256477    | conserved hypothetical protein                                       |           |
| IYQQTFSNTI  | 10     | Kd               | 11                               | 0.2             | 89256483    | conserved hypothetical protein                                       |           |
| KEYFPEIFFPL | 11     | Kb               | 387                              | 0.1             | 89256486    | conserved hypothetical protein                                       |           |
| SMLLQDVEM   | 9      | Db               | 65                               | 0.3             | 89256488    | conserved hypothetical protein                                       |           |
| FIPTNPTLL   | 10     | Db               | 220                              | 0.5             | 89256489    | conserved hypothetical protein                                       |           |
| GIYLSTRIKTL | 11     | Kb               | 282                              | 0.4             |             |                                                                      |           |
| KSYYMNPNTLI | 10     | Kb               | 226                              | 0.9             | 89256490    | conserved hypothetical protein                                       |           |
| GALKLILLAM  | 10     | Kb               | 320                              | 0.2             | 89256493    | conserved hypothetical protein                                       |           |
| YSSTYKNI    | 8      | Kb               | 428                              | 0.3             |             |                                                                      |           |
| FYINGRVTI   | 9      | Kd               | 3                                | 0.3             | 89256494    | conserved hypothetical protein                                       |           |
| KALSIEL     | 8      | Db               | 392                              | 0.2             | 89256495    | conserved hypothetical membrane protein                              |           |
| IYLRMYVEASI | 11     | Kd               | 7                                | 0.2             | 89256498    | tRNA modification GTPase trmE family protein                         |           |
| VGYTNQNESI  | 10     | Kb               | 115                              | 0.3             |             |                                                                      |           |
| AVYTTAKYAGM | 11     | Kb               | 81                               | 0.3             | 89256504    | Sodium-solute symporter family protein                               |           |
| STIVGIVSAL  | 10     | Kb               | 469                              | 0.4             |             |                                                                      |           |
| TPYQINSWSL  | 10     | Kb               | 212                              | 0.2             | 89256520    | Regulatory protein                                                   |           |
| KSLADIAYI   | 9      | Db               | 366                              | 0.4             | 89256521    | Cobalamin (vitamin B12) synthesis protein/P47K family protein        |           |
| SSLIUNL     | 8      | Kb               | 89                               | 0.2             | 89256526    | hypothetical protein                                                 |           |
| LLYARFFHKLM | 11     | Kb               | 117                              | 0.3             | 89256533    | Leucyl-tRNA synthetase                                               |           |
| KYIGGIEHAIM | 11     | Kd               | 237                              | 0.2             |             |                                                                      |           |
| RNYKLVQL    | 9      | Kb               | 51                               | 0.3             | 89256534    | hypothetical protein                                                 |           |
| KYEIDKSLI   | 9      | Kd               | 184                              | 0.6             |             |                                                                      |           |
| YYNHLVCL    | 9      | Kd               | 467                              | 0.4             | 89256539    | hypothetical protein                                                 |           |
| SSFIAVY     | 8      | Kb               | 250                              | 0.5             | 89256541    | Amino-acid permease                                                  |           |
| LHQPIRTKI   | 9      | Kd               | 227                              | 0.1             | 89256543    | conserved hypothetical protein                                       |           |
| ESWKYTNI    | 8      | Kb               | 90                               | 0.2             | 89256547    | conserved hypothetical protein                                       |           |
| LQLMMLEPKL  | 10     | Kb               | 116                              | 0.2             | 89256548    | ABC transporter, ATP-binding protein                                 |           |
| SLILFLT     | 8      | Kb               | 381                              | 0.5             | 89256553    | hypothetical protein                                                 |           |
| KYLFELIIFI  | 11     | Kd               | 191                              | 0.3             | 89256555    | conserved hypothetical membrane protein                              |           |
| HYAIGASLVAI | 11     | Kd               | 38                               | 0.4             | 89256555    | hypothetical protein                                                 |           |
| TYVLVCIL    | 9      | Kd               | 143                              | 0.4             |             |                                                                      |           |
| FLLSNEASFI  | 11     | Db               | 272                              | 0.2             | 89256563    | Short-chain dehydrogenase                                            |           |
| ALYCAISGHRM | 11     | Kb               | 411                              | 0.3             | 89256566    | Pyruvate/2-oxoglutarate dehydrogenase complex                        |           |
| LVFSDAEM    | 9      | Kb               | 224                              | 0.3             | 89256569    | Proton-dependent oligopeptide transport (POT) family protein         |           |
| QYHPEAYL    | 8      | Kd               | 188                              | 0.5             | 89256573    | anthranilate synthase component II                                   |           |
| VSDDFLEVHL  | 10     | Kb               | 362                              | NO              | 89256579    | conserved hypothetical protein                                       |           |
| STYQIEDLL   | 9      | Kb               | 42                               | 0.2             | 89256580    | Adenosylmethionine-8-amino-7-oxononanoate aminotransferase           |           |
| VSFVTNIL    | 8      | Kb               | 72                               | 0.3             | 89256587    | major facilitator superfamily (MFS) transport protein                |           |
| GVYLPKYSAL  | 11     | Kb               | 453                              | 0.1             | 89256587    | hypothetical membrane protein                                        |           |
| IIVFLAIF    | 8      | Kb               | 487                              | 0.4             |             |                                                                      |           |
| QYQSDTQGNI  | 10     | Kd               | 77                               | 0.3             | 89256595    | fatty acid hydroxylase                                               |           |
| SKLLNFKLSI  | 11     | Kb               | 424                              | 0.3             |             |                                                                      |           |
| FYPVAVLIFL  | 10     | Kd               | 165                              | 0.7             | 89256605    | amino acid antiporter                                                |           |
| YYGKYRSI    | 8      | Kd               | 226                              | 0.4             | 89256610    | Transposase                                                          |           |
| VSQQFRSYEL  | 10     | Kb               | 142                              | 0.3             | 89256613    | Glutamate-cysteine ligase                                            |           |
| SVLVLVKSM   | 9      | Kb               | 277                              | 0.3             |             |                                                                      |           |
| DTALFVEAM   | 9      | Kb               | 497                              | 0.3             |             |                                                                      |           |
| LYAQNKTTI   | 9      | Kd               | 3                                | 0.6             | 89256614    | virulence factor MvIN                                                |           |
| YVLFNGVMGVI | 11     | Db               | 221                              | 0.4             |             |                                                                      |           |
| SGDKYAFV    | 8      | Kb               | 281                              | 0.6             |             |                                                                      |           |
| TYLAMLGYLM  | 10     | Kd               | 472                              | 0.5             |             |                                                                      |           |
| LGFDITYYAI  | 10     | Kb               | 401                              | 0.3             | 89256623    | hypothetical membrane protein                                        |           |
| YFINSRIYSL  | 11     | Kb               | 356                              | 0.2             | 89256624    | hypothetical protein                                                 |           |
| TFYDCLNIL   | 9      | Kb               | 256                              | 0.3             | 89256625    | Transposase                                                          |           |
| FELENWCQI   | 9      | Db               | 289                              | 0.4             | 89256626    | hypothetical protein                                                 |           |
| VQYNQLVGRV  | 10     | Kb               | 478                              | 0.5             | 89256632    | outer membrane associated protein                                    |           |
| VVLHEIAHL   | 9      | Kb               | 337                              | 0.3             | 89256639    | conserved hypothetical protein                                       |           |
| QALSQCANSL  | 10     | Kb               | 204                              | 0.2             | 89256640    | prephenate dehydratase                                               |           |
| IGLPIAVFGM  | 10     | Kb               | 432                              | 0.5             | 89256645    | conserved hypothetical membrane protein                              |           |
| KYKQRKEHERL | 11     | Kd               | 234                              | 0.1             | 89256650    | Transposase                                                          |           |
| FFVRQPEAL   | 9      | Kd               | 498                              | 0.6             | 89256656    | UTP-glucose-1-phosphate uridylyltransferase                          |           |
| HYVPGGFKDFM | 11     | Kd               | 83                               | 0.3             | 89256658    | hypothetical membrane protein                                        |           |
| AVTMFFSANM  | 10     | Kb               | 345                              | 0.4             | 89256666    | conserved hypothetical membrane protein                              |           |
| MSLDDLKPM   | 9      | Kb               | 353                              | 0.3             |             |                                                                      |           |
| TTIKLTRPSL  | 10     | Kb               | 49                               | 0.2             | 89256671    | hypothetical lipoprotein                                             |           |
| ISLTNIII    | 8      | Db               | 36                               | 0.5             | 89256687    | Galactose-proton symporter, MFS transport protein                    |           |
| FSVIAFFAFL  | 10     | Db               | 103                              | 0.6             |             |                                                                      |           |
| CYLCPTNI    | 8      | Kd               | 41                               | NO              | 89256689    | Galactose-1-phosphate uridylyltransferase                            |           |
| YSIYNRGEIM  | 10     | Db               | 96                               | 0.5             | 89256693    | conserved hypothetical protein                                       |           |
| TSFYKKYAKSL | 11     | Kb               | 16                               | 0.3             | 89256709    | capsule biosynthesis protein capB                                    |           |
| MALQPLLQSL  | 10     | Kb               | 70                               | 0.3             |             |                                                                      |           |
| WGLLSDYL    | 8      | Db               | 200                              | 0.4             | 89256710    | major facilitator superfamily (MFS) transport protein                |           |
| VAINPGSSQL  | 10     | Kb               | 462                              | 0.1             | 89256713    | Carbohydrate/purine kinase pfkB family protein                       |           |
| SYAKEDSR    | 9      | Kd               | 81                               | 0.2             | 89256717    | glycosyl transferase family protein                                  |           |
| MSLIRKIKLSL | 11     | Kb               | 101                              | 0.4             | 89256718    | hypothetical protein                                                 |           |
| PYPVADLLQTI | 11     | Dd               | 218                              | 0.5             | 89256722    | glycosyl transferases group 1 family protein                         |           |
| LVLSHFLGKGL | 11     | Kb               | 354                              | 0.4             | 89256732    | Arylsulfatase                                                        |           |
| SNPKYLVG    | 8      | Kb               | 39                               | 0.2             | 89256745    | 50S ribosomal protein L27                                            |           |
| LGPMFGPL    | 8      | Kb               | 55                               | 0.4             | 89256759    | major facilitator superfamily (MFS) transport protein                |           |
| GFCEGMFTMI  | 10     | Kd               | 220                              | 0.5             | 89256761    | hypothetical protein                                                 |           |
| SYSSGDILL   | 9      | Kd               | 242                              | NO              | 89256766    | thiamine pyrophosphokinase                                           |           |
| FTLSEDDLFL  | 10     | Db               | 492                              | 0.3             |             |                                                                      |           |
| LCTNMFINTL  | 10     | Kb               | 288                              | 0.5             | 89256769    | Permease YjgP/YjgQ family protein                                    |           |
| KYAKLLPSVVV | 11     | Kd               | 427                              | 0.3             |             |                                                                      |           |
| INLYISASL   | 9      | Kb               | 47                               | 0.7             | 89256774    | conserved hypothetical membrane protein                              |           |
| SAVLRWLNLQL | 11     | Kb               | 154                              | 0.3             | 89256778    | FAD-binding family protein                                           |           |
| ASYFIFCLIMV | 11     | Kb               | 301                              | 0.7             | 89256782    | polysaccharide biosynthesis protein (export protein)                 |           |
| KTVTNSQDKV  | 10     | Db               | 415                              | NO              | 89256783    | hypothetical protein                                                 |           |
| KYKSGDLL    | 8      | Kd               | 82                               | 0.2             | 89256785    | ABC transporter, ATP-binding and membrane protein                    |           |
| LTTQLVMFL   | 9      | Kb               | 317                              | 0.9             | 89256790    | major facilitator superfamily (MFS) transport protein                |           |
| RYFEGRDPTI  | 10     | Kd               | 8                                | 0.4             | 89256796    | D-alanyl-D-alanine carboxypeptidase/D-alanyl-D-alanine-endopeptidase |           |
| VILALYSAM   | 9      | Kb               | 43                               | 0.4             |             |                                                                      |           |
| STYYLVNV    | 8      | Kb               | 127                              | 0.5             | 89256797    | Glycerol-3-phosphate transporter                                     |           |

| Sequence     | Length | Predicted allele | Affinity (IC <sub>50</sub> , nM) | Cluster density | Protein gi# | Protein annotation                                          | Responder |
|--------------|--------|------------------|----------------------------------|-----------------|-------------|-------------------------------------------------------------|-----------|
| LKIFARLHSL   | 10     | Kb               | 265                              | 0.2             | 89256800    | ABC transporter, ATP-binding protein                        |           |
| YAIFLKEVIHM  | 11     | Db               | 169                              | 0.5             | 89256801    | ABC-2 type transport system permease protein                |           |
| RYYAIFLKEVI  | 11     | Kd               | 226                              | 0.5             |             |                                                             |           |
| ATFPFIANL    | 10     | Kb               | 52                               | 0.4             | 89256802    | ABC transporter, membrane protein                           |           |
| KSVQNPDLQEV  | 11     | Db               | 93                               | 0.2             | 89256803    | Transposase                                                 |           |
| VLYFFAIFLNM  | 11     | Kb               | 56                               | 0.3             | 89256809    | serine transporter                                          |           |
| VGLIFIVL     | 8      | Kb               | 173                              | 0.7             |             |                                                             |           |
| ASLMAISTL    | 9      | Kb               | 59                               | 0.3             | 89256813    | major facilitator superfamily (MFS) transport protein       |           |
| AYGLGSVISPV  | 11     | Kd               | 399                              | 0.4             |             |                                                             |           |
| IYLLNALYGI   | 11     | Db               | 65                               | 0.7             | 89256814    | nicotinamide mononucleotide transport (NMT) family protein  |           |
| SSFITLSI     | 9      | Kb               | 478                              | 0.4             | 89256815    | 23S rRNA (Uracil-5)-methyltransferase                       |           |
| IMLFNDRKL    | 9      | Db               | 145                              | 0.3             | 89256818    | uridine kinase                                              |           |
| IRVRLFESL    | 9      | Kb               | 107                              | 0.4             | 89256824    | hypothetical protein                                        |           |
| WYITGDKGKI   | 10     | Kd               | 18                               | 0.3             | 89256826    | conserved hypothetical protein                              |           |
| ILPIHFAGFL   | 10     | Kb               | 270                              | 0.2             |             |                                                             |           |
| YSPKLEMSL    | 10     | Kb               | 166                              | 0.7             | 89256836    | hypothetical membrane protein                               |           |
| LTFHRAIDL    | 9      | Kb               | 242                              | NO              | 89256843    | CutC family protein                                         |           |
| IGPELMEKL    | 9      | Kb               | 159                              | NO              | 89256848    | thioredoxin reductase                                       |           |
| SIYLVAGIFI   | 11     | Kb               | 482                              | 0.5             | 89256852    | hypothetical membrane protein                               |           |
| KYIYTSDDNM   | 10     | Kd               | 67                               | 0.4             | 89256859    | Putrescine-binding periplasmic protein                      |           |
| LMFITAVKL    | 9      | Kb               | 113                              | 0.6             | 89256860    | Glutamate:gamma-aminobutyric acid antiporter family protein |           |
| CALLTAEM     | 8      | Db               | 173                              | 0.6             |             |                                                             |           |
| SGVNMFRNHL   | 10     | Kb               | 68                               | 0.4             | 89256861    | PerM family protein                                         |           |
| IAILKNGI     | 9      | Kb               | 360                              | NO              | 89256862    | Single-stranded-DNA-specific exonuclease                    |           |
| SAYIGMIKL    | 9      | Kb               | 47                               | 0.5             | 89256866    | Transposase                                                 |           |
| VSILNKIDIL   | 10     | Db               | 53                               | 0.3             | 89256867    | hypothetical membrane protein                               |           |
| IEAINYNM     | 9      | Kb               | 474                              | 0.6             | 89256870    | 3-dehydroquinate dehydratase, type II                       |           |
| GDPYDNAWK    | 9      | Dd               | 67                               | NO              | 89256874    | organic solvent tolerance protein                           |           |
| ITYEFTTEL    | 9      | Kb               | 64                               | 0.4             | 89256886    | Dolichyl-phosphate-mannose-protein mannosyltransferase      |           |
| KYEEGMTEF    | 9      | Kd               | 298                              | 0.2             | 89256887    | Transposase                                                 |           |
| TRYASILRQL   | 11     | Kb               | 170                              | 0.4             | 89256893    | phosphoenolpyruvate carboxykinase                           |           |
| TKYSYAGT     | 8      | Kb               | 189                              | 0.5             | 89256900    | conserved hypothetical membrane protein                     |           |
| KSIIKFI      | 8      | Db               | 198                              | 0.5             | 89256901    | major facilitator superfamily (MFS) transport protein       |           |
| TGIALYETV    | 9      | Kb               | 374                              | 0.2             | 89256903    | rRNA methylase                                              |           |
| PLYSFAYL     | 8      | Kb               | 95                               | 0.6             | 89256905    | hypothetical protein                                        |           |
| VAFQELDAI    | 9      | Kb               | 181                              | 0.4             | 89256906    | hypothetical membrane protein                               |           |
| ASAKQIANL    | 9      | Kb               | 319                              | 0.2             |             |                                                             |           |
| LSILRGWSL    | 9      | Kb               | 299                              | 0.1             | 89256907    | Transposase                                                 |           |
| VKSIFIASCSM  | 11     | Kb               | 470                              | 0.6             | 89256910    | hypothetical protein                                        |           |
| SNWQRVIDNL   | 11     | Kb               | 310                              | NO              | 89256912    | Chitinase, fragment                                         |           |
| YLINFGVKL    | 11     | Db               | 493                              | 0.8             | 89256917    | amino acid transporter protein, fragment                    |           |
| ASFHKSSKL    | 9      | Kb               | 250                              | NO              | 89256920    | Transposase                                                 |           |
| YSVHYAGL     | 8      | Kb               | 14                               | 0.4             | 89256922    | major facilitator superfamily (MFS) transport protein       |           |
| WAGLLYPTVI   | 11     | Db               | 355                              | 0.3             | 89256924    | major facilitator superfamily (MFS) transport protein       |           |
| VWYFNKICQP   | 11     | Kb               | 371                              | 0.4             |             |                                                             |           |
| LAQAYFIFNM   | 10     | Kb               | 339                              | 0.4             | 89256927    | hypothetical protein                                        |           |
| IGINIINYV    | 9      | Kb               | 377                              | 0.3             | 89256935    | nucleoside permease NUP family protein                      |           |
| TYEFLNDQV    | 9      | Kd               | 476                              | 0.3             | 89256935    |                                                             |           |
| PVIQIASL     | 9      | Kb               | 218                              | 0.4             | 89256941    | Lipid A transport protein, ABC transporter                  |           |
| SNCIFNTL     | 10     | Kb               | 280                              | 0.3             | 89256943    | disulfide bond formation protein                            |           |
| IVVYAPIGMM   | 10     | Kb               | 447                              | 0.5             | 89256945    | Transporter AcrB/AcrD/AcrF family                           |           |
| ANYWLHSGM    | 9      | Kb               | 42                               | 0.2             | 89256953    | CysteinyI-tRNA synthetase                                   |           |
| VFLTYDEL     | 9      | Kb               | 334                              | 0.5             | 89256954    | Adenine-specific methylase, HemK family                     |           |
| IAYRQPVKIL   | 10     | Kb               | 16                               | 0.3             | 89256962    | hypothetical protein                                        |           |
| DYVGKFSI     | 8      | Kd               | 368                              | 0.2             | 89256964    | hypothetical protein                                        |           |
| VSDLNVSVAL   | 10     | Kb               | 434                              | 0.3             |             |                                                             |           |
| ITLDNLLTI    | 9      | Db               | 70                               | 0.8             | 89256966    | metal ion transporter                                       |           |
| LEYQYKQSL    | 10     | Kb               | 22                               | 0.2             | 89256969    | Sodium/proline permease                                     |           |
| RAYIKQGKSL   | 10     | Kb               | 111                              | 0.5             | 89256972    | amino acid transporter                                      |           |
| SFLIPYNNPSL  | 11     | Kb               | 174                              | 0.3             |             |                                                             |           |
| KAIKQTFWRL   | 10     | Db               | 410                              | 0.3             |             |                                                             |           |
| TAFSTIATTL   | 10     | Kb               | 38                               | 0.2             | 89256977    | potassium uptake protein                                    |           |
| AYLSGRNELL   | 10     | Kd               | 37                               | 0.5             | 89256978    | hypothetical protein                                        |           |
| IYQENYAP     | 10     | Kb               | 312                              | 0.4             | 89256979    | ProP osmoprotectant transporter, fragment                   |           |
| IIISLIAML    | 9      | Kb               | 119                              | 0.7             | 89256985    | conserved hypothetical membrane protein                     |           |
| DHPDASTL     | 8      | Dd               | 424                              | 0.2             | 89256987    | Transposase                                                 |           |
| LGKYFVWQKL   | 11     | Kb               | 45                               | 0.3             | 89256989    | modification methylase                                      |           |
| VNFGMFCTL    | 9      | Kb               | 51                               | 0.3             | 89256994    | Efflux protein                                              |           |
| SILTKILFVSL  | 11     | Kb               | 139                              | 0.6             | 89256999    | hypothetical protein                                        |           |
| IGYLLISKV    | 9      | Kb               | 165                              | 0.7             |             |                                                             |           |
| VALIAIPWYAM  | 11     | Kb               | 99                               | 0.4             | 89257009    | fatty acid desaturase                                       |           |
| IGLFLDMPL    | 9      | Kb               | 54                               | 0.4             | 89257012    | DNA-directed RNA polymerase, beta subunit                   |           |
| FGPEKDDDF    | 9      | Dd               | 272                              | 0.2             | 89257015    | 50S ribosomal protein L10                                   |           |
| TAIQGYTI     | 8      | Db               | 151                              | 0.2             | 89257021    | Helicase                                                    |           |
| LYVAMTRARKL  | 11     | Kd               | 478                              | 0.5             |             |                                                             |           |
| IGVKLYEFL    | 9      | Kb               | 67                               | 0.2             | 89257025    | anaerobic glycerol-3-phosphate dehydrogenase                |           |
| GIFASKVFESL  | 11     | Kb               | 422                              | 0.3             | 89257029    | hypothetical protein                                        |           |
| SYQEENNI     | 8      | Kd               | 122                              | 0.4             | 89257031    | sensor histidine kinase                                     |           |
| MGILFLL      | 8      | Kb               | 12                               | 0.6             | 89257033    | cytochrome oxidase bd-II, subunit II                        |           |
| AVFRRENTI    | 10     | Kb               | 332                              | 0.2             | 89257036    | twitching motility protein PilT                             |           |
| LAGYNVSAL    | 9      | Kb               | 162                              | 0.4             | 89257045    | adenine phosphoribosyltransferase                           |           |
| PGIMFRDITPL  | 11     | Kb               | 237                              | 0.2             |             |                                                             |           |
| IAIPLCVVAM   | 10     | Kb               | 213                              | 0.3             | 89257051    | succinate dehydrogenase, cytochrome b556                    |           |
| FAMSIASFLL   | 10     | Db               | 85                               | 0.2             | 89257064    | ATP synthase A chain                                        |           |
| FAASFALATAAM | 11     | Kb               | 269                              | 0.4             | 89257066    | major facilitator superfamily (MFS) transport protein       |           |
| FSLLEIKL     | 8      | Db               | 182                              | 0.2             | 89257067    | ribosomal large subunit pseudouridine synthase C            |           |
| QYLKPYHAEL   | 10     | Kd               | 86                               | 0.2             | 89257070    | Histidyl-tRNA synthetase                                    |           |
| VIVYEGTLES   | 10     | Kb               | 41                               | 0.2             | 89257072    | translation initiation factor IF-2                          |           |
| TFYDCLNIL    | 9      | Kb               | 256                              | 0.3             | 89257076    | Transposase                                                 |           |
| FSPVTLMCSSL  | 11     | Db               | 327                              | 0.5             | 89257079    | NADH dehydrogenase I, L subunit                             |           |
| YAFVMMVGVLL  | 11     | Kb               | 488                              | 0.6             |             |                                                             |           |
| AAAMTAITLTL  | 11     | Db               | 352                              | 0.4             | 89257081    | NADH dehydrogenase I, J subunit                             |           |
| ISYGEITFSI   | 10     | Kb               | 196                              | 0.2             | 89257088    | NADH dehydrogenase I                                        |           |
| ATMMIYSSL    | 9      | Kb               | 31                               | 0.4             | 89257095    | conserved membrane protein                                  |           |

| Sequence    | Length | Predicted allele | Affinity (IC <sub>50</sub> , nM) | Cluster density | Protein gi# | Protein annotation                                         | Responder |
|-------------|--------|------------------|----------------------------------|-----------------|-------------|------------------------------------------------------------|-----------|
| FALSLEFL    | 8      | Db               | 98                               | 0.4             |             |                                                            |           |
| FATMMIYSSL  | 10     | Kb               | 188                              | 0.4             |             |                                                            |           |
| KALGMIVYGP  | 11     | Kb               | 284                              | 0.4             |             |                                                            |           |
| KNYFYPDL    | 8      | Kb               | 9                                | 0.5             | 89257101    | Aspartyl/glutamyl-tRNA(Asn/Gln) amidotransferase subunit B |           |
| MQLKSFEML   | 9      | Kb               | 170                              | 0.3             | 89257105    | RND efflux membrane fusion protein                         |           |
| CIVLVFVPM   | 10     | Kb               | 228                              | 0.4             | 89257107    | toxin secretion ABC transporter ATP-binding protein        |           |
| KYAKMLEVEL  | 10     | Kd               | 10                               | 0.2             | 89257110    | adenylosuccinate lyase                                     |           |
| TQLYKRT     | 8      | Kb               | 160                              | 0.5             | 89257113    | hypothetical lipoprotein                                   |           |
| QMLAQLKSL   | 9      | Kb               | 273                              | 0.4             | 89257115    | phosphoribosylformylglycinamide synthase                   |           |
| TYIKDTPVI   | 10     | Kd               | 126                              | 0.2             | 89257122    | protease yegQ                                              |           |
| MLPSGSREII  | 10     | Dd               | 346                              | NO              |             |                                                            |           |
| IAMLFPATSSL | 11     | Kb               | 22                               | 0.4             | 89257123    | multidrug resistance protein, membrane located             |           |
| VVFGSAGL    | 8      | Kb               | 313                              | 0.4             |             |                                                            |           |
| SYIVKTHF    | 9      | Kd               | 105                              | 0.2             | 89257125    | amino acid transporter                                     |           |
| SAFIFAWPTL  | 10     | Kb               | 20                               | 1.2             | 89257127    | aromatic amino acid transporter of the HAAAP family        |           |
| SIYLLLYSL   | 11     | Kb               | 78                               | 0.5             |             |                                                            |           |
| FAIAVVIM    | 8      | Db               | 390                              | 0.5             |             |                                                            |           |
| IGISGMDRL   | 9      | Kb               | 416                              | 0.2             | 89257133    | Potassium-transporting ATPase B chain                      |           |
| TAMTFSYV    | 8      | Kb               | 213                              | 0.4             | 89257144    | hypothetical protein                                       |           |
| SSIPTYFLL   | 11     | Kb               | 298                              | 0.9             | 89257149    | conserved hypothetical membrane protein                    |           |
| QSFNALLKTL  | 10     | Kb               | 232                              | 0.3             | 89257153    | DNA polymerase III, gamma/tau subunits                     |           |
| FAVINMYVYL  | 10     | Db               | 5                                | 0.5             | 89257168    | YggT family protein                                        |           |
| IAPSYTQEAL  | 10     | Kb               | 25                               | 0.3             | 89257172    | bifunctional purine biosynthesis protein                   |           |
| FFITTIICIL  | 10     | Kd               | 190                              | 0.5             | 89257175    | permease of ABC transporter                                |           |
| ESLQNFLFENM | 11     | Kb               | 192                              | 0.4             | 89257180    | tRNA processing ribonuclease BN                            |           |
| ISHKMTSL    | 8      | Kb               | 240                              | 0.6             |             |                                                            |           |
| MQYMKVTL    | 8      | Kb               | 403                              | 0.6             |             |                                                            |           |
| NVYRYSLL    | 8      | Kb               | 9                                | 0.3             | 89257182    | Primosomal protein N                                       |           |
| RILDKPISL   | 9      | Kb               | 443                              | 0.3             |             |                                                            |           |
| LYIPAFIAII  | 10     | Kd               | 54                               | 0.8             | 89257187    | major facilitator superfamily (MFS) transport protein      |           |
| IAQYRCINAL  | 10     | Kb               | 71                               | 0.5             |             |                                                            |           |
| NPYQALAQL   | 9      | Kb               | 446                              | 0.3             | 89257198    | conserved hypothetical protein                             |           |
| MGASFRNV    | 8      | Kb               | 394                              | NO              | 161353781   | Transaldolase                                              |           |
